# Supplementary material for: Striatal dopamine gene network moderates the effect of early adversity on the risk for adult psychiatric and cardiometabolic comorbidity
Source: bioRxiv or medRxiv preprint supplement (doi:10.1101/2022.04.23.22274209), 2023-12-15
Supplement: Supplementary file [file media-1.pdf]

## **A mesocorticolimbic dopamine gene network moderates the effect of early adversity on the risk for psychiatric and cardio-metabolic comorbidities**

### *Supplementary*

#### **Supplementary Materials and Methods**

##### Participants

We used genomic and phenotypic data from two cohorts, one of adults and one of adolescents: 1) the UK Biobank and 2) Avon Longitudinal Study on Parents and Children (ALSPAC).

*UK Biobank – Adult cohort:* Consenting participants provided baseline information, answered questions, had measurements and biological samples collected. The genotyping data was available for 487,409 subjects. This research has been conducted using the UK Biobank Resource under application number 41975. For the purpose of this project, only non-related subjects were considered in the analysis. Exclusion criteria were 1) participants who withdrew their consent from the study, 2) no genotyping data, 3) related participants (genetic kinship to other participants > 0.04), 4) inconsistencies in genetic and reported sex and 5) outliers for heterozygosity. All included subjects selected for the analysis included these criteria: (1) have genotyping data available and (2) have both the diagnosis outcome and adversity score. Only unrelated individuals were considered. Detailed description of each inclusion and exclusion criteria and the corresponding sample size at each step can be found in **Supplementary Figure 1**.

*ALSPAC – Adolescent cohort:* Participants provided informed written consent to participate in the study. Informed consent for the use of data collected via questionnaires and clinics was obtained from participants following the recommendations of the ALSPAC Ethics and Law Committee at the time (a full list of the ethics committees that approved different aspects of the ALSPAC studies is available at <http://www.bristol.ac.uk/alspac/researchers/research-ethics/>). Consent for biological samples has been collected in accordance with the Human Tissue Act (2004). Data were collected during clinic visits or with postal questionnaires. Please note that the study website contains details of all the data that is available through a fully searchable data dictionary and variable search tool at <http://www.bristol.ac.uk/alspac/researchers/our-data/>. The following inclusion criteria were applied: unrelated individuals, gestational age between 37 and 42 weeks inclusively, maternal age at delivery  $\geq$  18 years old, birth weight of at least 2000 grams, singleton pregnancies. Detailed description of each inclusion and exclusion criteria and the corresponding sample size at each step can be found in **Supplementary Figure 2**.

##### Genotyping

*Adult cohort:* Blood samples from the UK Biobank were genotyped at the Affymetrix Research Services Laboratory in Santa Clara, California, USA. Genotyping was conducted using a bespoke BiLEVE Axiom array for 50,000 participants and the remaining 450,000 participants were genotyped using the Affymetrix UK Biobank Axiom array. The two SNP arrays are very similar with over 95% common marker content. Axiom Array plates were processed on the Affymetrix GeneTitan® Multi-Channel (MC) Instrument. Genotypes were then called from the resulting intensities in batches of ~4,700 samples (~4,800 including the controls) using the Affymetrix Power Tools software and the Affymetrix Best Practices Workflow. Individuals with the same genotype at any given SNP will cluster together in a two-dimensional intensity space (one dimension for each targeted allele). For the interim data release, Affymetrix performed further rounds of genotype calling using algorithms customized for the UK Biobank project. These algorithms targeted very rare SNPs with 6 or fewer minor alleles in a batch, and a subset of SNPs for which the generic calling algorithm did not perform optimally. After genotype calling, Affymetrix performed quality control in each batch separately, to exclude SNPs with poor cluster properties. If a SNP did not meet the Affymetrix prescribed QC thresholds in a given batch, it was set to missing in all individuals from that batch. Hardy-Weinberg equilibrium was performed for each batch. Affymetrix also checked sample quality (such as DNA concentration) and genotype calls were provided only for samples with sufficient DNA metrics. For SNP-based QC metrics, only individuals with similar ancestry and the population structure were characterized by computing principal components using only UK Biobank individuals. The array also includes coding variants across a range of minor allele frequencies (MAFs), including rare markers (<1% MAF); and markers that provide good genome-wide coverage for imputation in European populations in the common (>5%) and low frequency (1–5%) MAF ranges. More information about the genotyping protocol, QC and imputation could be found in<sup>1</sup>. The population structure of the UK Biobank cohort was evaluated using fastPCA algorithm for principal component analysis<sup>2</sup>. To account for population stratification, the first forty principal components were included in the UK Biobank analysis.

*Adolescent cohort:* Subjects in ALSPAC cohort were genotyped using the Illumina HumanHap550 quad genome-wide SNP genotyping platform by the Wellcome Trust Sanger Institute (Cambridge, UK) and the Laboratory Corporation of America (Burlington, NC, US)<sup>3</sup>. The following quality control procedure was applied: participants with inconsistencies in self-reported and genotyped sex, minimal or extreme heterozygosity, high levels of individual missingness (>3%), and insufficient sample replication (IBD < 0.8) were excluded. SNPs with MAF of <1%, a call rate <95%, or those not in HWE ( $p < 5 \times 10^{-7}$ ) were removed. Imputation was conducted using Impute v3 and Haplotype Reference Consortium (HRC) imputation reference panel (release 1.1). The resulting data set consisted of 8,365 individuals and 38,898,739 SNPs available for analysis. The population structure of the ALSPAC cohort was described using principal component analysis<sup>4,5</sup>, which was conducted on the genotyped autosomal SNPs with MAF

> 5% with the following pruning parameters for linkage disequilibrium: 100-kilobase sliding window, an increment of 5 SNPs, and variance inflation factor threshold of 1.01. To account for population stratification, the first ten PCs were included in the analysis. To account for population stratification, the first ten principal components were included in the ALSPAC analysis.

#### Gene expression levels at different developmental stages

In order to investigate if the genes that composed the mesocorticolimbic DAT1 ePRS have similar patterns of gene co-expression during different life periods in humans, we used the gene expression data from human samples extracted from the BrainSpan database<sup>6</sup>. The correlation patterns were compared during three different stages of development: childhood PFC (0 to 12 years old, N=8), adolescence PFC (13 to 19 years old, N=5), and adulthood PFC (20 to 40 years old, N=6), childhood striatum (0 to 12 years old, N=4), adolescence striatum (13 to 19 years old, N=3), and adulthood striatum (20 to 40 years old, N=6). The analyses were carried out in R (<https://www.r-project.org>)<sup>7</sup> using the heatmaply package<sup>8</sup>.

#### Genome-wide association study (GWAS) enrichment

Genetic correlations comparing the SNPs included in the mesocorticolimbic DAT1 ePRS with SNPs relevant for other traits were made using LD Hub (<http://ldsc.broadinstitute.org/ldhub/>). LD Hub is a database that contains summary-level GWAS results for several diseases/traits from different resources that automates LD score regression analyses<sup>9</sup>. GWAS from UK Biobank cohort were not considered in this analysis to avoid duplication.

We also performed GWAS enrichment analysis using a set of GWAS for metabolic and neuropsychiatric disorders. Summary statistics from GWAS meta-analyses of schizophrenia (SCZ)<sup>10</sup>, attention deficit hyperactivity disorder (ADHD)<sup>11</sup>, major depressive disorder (MDD)<sup>12</sup> and suicide attempt in MDD<sup>13</sup> were downloaded from the Psychiatric Genomics Consortium website (<https://www.med.unc.edu/pgc/downloads>). GWAS summary statistics for type II Diabetes<sup>14</sup>, BMI<sup>15</sup> and Coronary Artery Disease<sup>16</sup> were obtained from the respective studies. Gene-level analysis of GWAS results was performed by FUMA<sup>17</sup>, a gene-set annotation framework that accounts for linkage disequilibrium (LD) between SNPs. An annotation step is performed, in which SNPs are mapped onto genes, and gene-level analysis is carried out to create aggregate statistics for each gene. The same procedure was performed in FUMA for our DAT1 ePRS gene list. To quantify the enrichment of GWAS signals within the DAT1 ePRS gene list, we calculated Spearman's correlation between the co-expression correlation coefficients from each gene in the network, and the  $-\log_{10}$  p-value for the significance of the SNPs within that gene in each GWAS study<sup>18</sup>.

#### Early Life Adversity Score

The early life adversity scores for UK Biobank and ALSPAC cohorts were created using a cumulative measure combining multiple indicators of early life adversity according to the methods demonstrated previously<sup>19</sup>. The presence of each component yielded 1 point and the total score represents the summation of all points. The variables used to create the early life adversity score in each cohort are described in Table 1. For the UK Biobank cohort, small and large birth size was defined as the 10th and above the 90th percentile, respectively; as gestational age information is not available, all values were considered at term (variable ID20022). The exposure to maternal smoking question (ID1787) is part of a questionnaire related to early life exposures. From an online follow-up questionnaire called Thoughts and Feelings, we obtained information about feeling hated by family member during childhood (1 point if the answer was sometimes, often, or very often; ID20487). The same questionnaire provided information about feeling loved during childhood (1 point if the response was never or rarely; ID20489). Finally, data on having nobody to take to the doctor when needed (one point if the response was often, half a point was given if the response was rarely had someone; ID20491). Presence of domestic violence during childhood (physical or sexual) was also counted as one point (ID20488). For more information see <https://biobank.ndph.ox.ac.uk/showcase/>.

For the ALSPAC cohort, similar to UK Biobank, small and large birth size was defined as the 10th and above 90th percentile, respectively, for the reported gestational age at birth. Presence of smoking during pregnancy was derived from a questionnaire applied at 32 weeks' gestation ("Your Pregnancy"), and one point was attributed if smoking was reported. Presence of hospitalization in the first 6 months of life was derived from a questionnaire applied to the mothers and called "My Daughter/Son at 6 months"; one point was given in case a child was hospitalized in the first 6 months of life. Financial difficulties score was based on self-reported mother's answers from the Looking After the Baby questionnaire about difficulties in affording clothes, food, rent and baby items in the infant's first months of life. Scores ranged from 0 to 15; scores above 7 were given one point in the early life adversity score. Presence of domestic violence (physical) during childhood was accessed through a questionnaire on the infant and mother lifestyle during early childhood; one point was given if domestic violence was reported. Mother interaction score was computed according to maternal self-report questions about how often certain activities were performed (bathing, feeding, singing, play with toys, take for walks, etc). The sum of these items ranged from 0 to 36; one point was attributed to the early life adversity score if the sum was equal or lower than 23. Maternal mental health was accessed through the Edinburgh Postnatal Depression Scale (EPDS)<sup>20</sup>, and the scores above 10 contributed one point towards the early life adversity score. For more information on ALSPAC variables, please see <http://www.bristol.ac.uk/alspac/researchers/our-data/>.

### Outcome measures

UKBiobank: Comorbidity between psychiatric and cardio-metabolic disorders: To access the presence of psychiatric and cardio-metabolic comorbidities within the UK Biobank cohort, we utilized diagnostic terms from across all participants hospital inpatient records, coded according to the International Classification of Diseases version 10 (ICD-10)<sup>21</sup>. Diagnostic terms from the ICD10 chapter V Mental and behavioural disorders included: F10-F19 Mental and behavioural disorders due to psychoactive substance use; F20-F29 Schizophrenia, schizotypal and delusional disorders; F30-F39 Mood disorders and F40-F48 Neurotic, stress-related and somatoform disorders. For the cardio-metabolic disorders diagnostic categories considered were: From chapter IV Endocrine, nutritional and metabolic diseases, E11 Non-insulin-dependent diabetes mellitus; from chapter IX Diseases of the circulatory system, I70 Atherosclerosis, I63 Cerebral infarction and ischaemic heart diseases I20 to I25. The presence of at least one cardio-metabolic diagnosis and at least one psychiatric diagnosis was considered a “co-morbidity” case.

ALSPAC: The indicators of risk to develop psychiatric disorders comprised: a) total difficulties score as measured by the Strengths and Difficulties Questionnaire<sup>22</sup> filled out by primary caregivers of 16.6 year old participants. This instrument evaluates behavioral problems, and a total difficulties score is computed by adding four domains of the scale (emotional symptoms, conduct problems, hyperactivity/inattention and peer relationship problems) that represent negative behaviors; b) depression score and c) anxiety score as measured by the Computerized Interview Schedule – Revised (CIS-R) that establishes the nature and severity of neurotic symptoms<sup>23</sup>, applied to 17.5 year old participants. The indicators of risk to develop metabolic disorder involved: d) insulin resistance as measured by the Homeostatic Model Assessment of Insulin Resistance (HOMA-IR), calculated using plasma fasting glucose (mmol/l) and insulin (pmol/l) levels collected at 17.5 years of age. The calculation followed the updated version of the HOMA-IR index developed by Wallace et al (2004)<sup>24</sup> and was computed using the HOMA2 calculation tool (<http://www.dtu.ox.ac.uk/homacalculator/>); and e) waist circumference (cm) measured at 15.5 years of age.

*Gray matter density from UK Biobank participants:* T1 structural brain MRI pre-processed imaging data were generated by an image-processing pipeline developed and run on behalf of the UK Biobank<sup>25</sup>. High-resolution T1-structural images for the whole brain were acquired with straight sagittal orientation using a Siemens Skyra 3T running VD13A SP4, with a standard Siemens 32-channel RF receive head coil. The following parameters were used: resolution 1x1x1mm; field-of-view 208x256x256 matrix; 5 minutes duration; 1 mm isotropic resolution using 3D MPRAGE acquisition; in-plane acceleration iPAT=2; prescan-normalize. Full 3D gradient distortion correction (GDC) was applied to the original T1 image and the field of view (FOV) was cut down to reduce the amount of non-brain tissue. Tools used to achieve this

include BET (Brain Extraction Tool), FLIRT (FMRIB's Linear Image Registration Tool), and the MNI152 “nonlinear 6th generation” standard-space T1 template. A non-linear registration to MNI152 space was used with FNIRT (FMRIB's Nonlinear Image Registration Tool). Using the inverse of the MNI152 alignment warp, a standard-space brain mask was transformed into the native T1 space and applied to the T1 image to generate a brain-extracted T1. Tissue-type segmentation was applied using FAST (FMRIB's Automated Segmentation Tool). These data were then used to carry out a SIENAX17 analysis to obtain the total brain volume. In this study, T1 images were normalized for the head size.

**Supplementary Figure 1. UK Biobank Sample size block scheme for each inclusion and exclusion criteria applied**

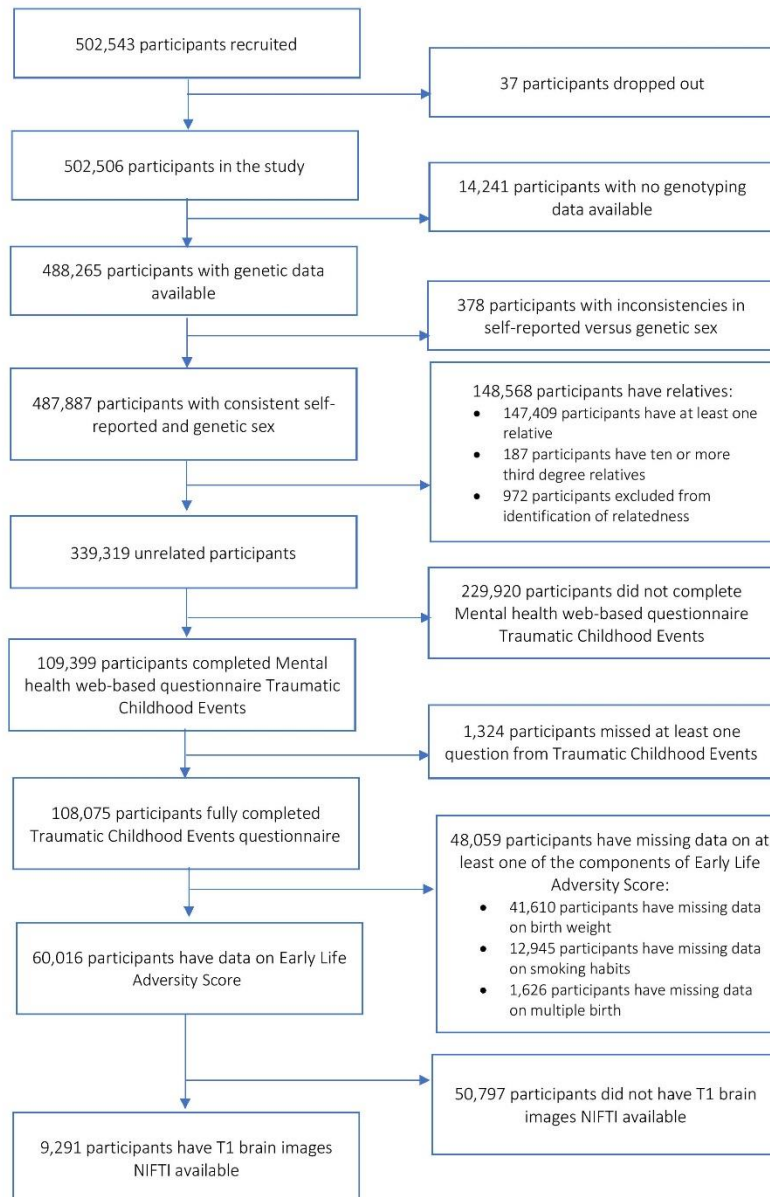

**Supplementary Figure 1. UK Biobank Sample size block scheme for each inclusion and exclusion criteria applied.** Block scheme depicting each step of inclusion and exclusion criteria applied to the original sample (N=502,543) until reaching final sample size for main hypothesis testing (N=60,016) and final sample size for parallel ICA analysis (N=9,291)

**Supplementary Figure 2. ALSPAC Sample size block scheme for each inclusion and exclusion criteria**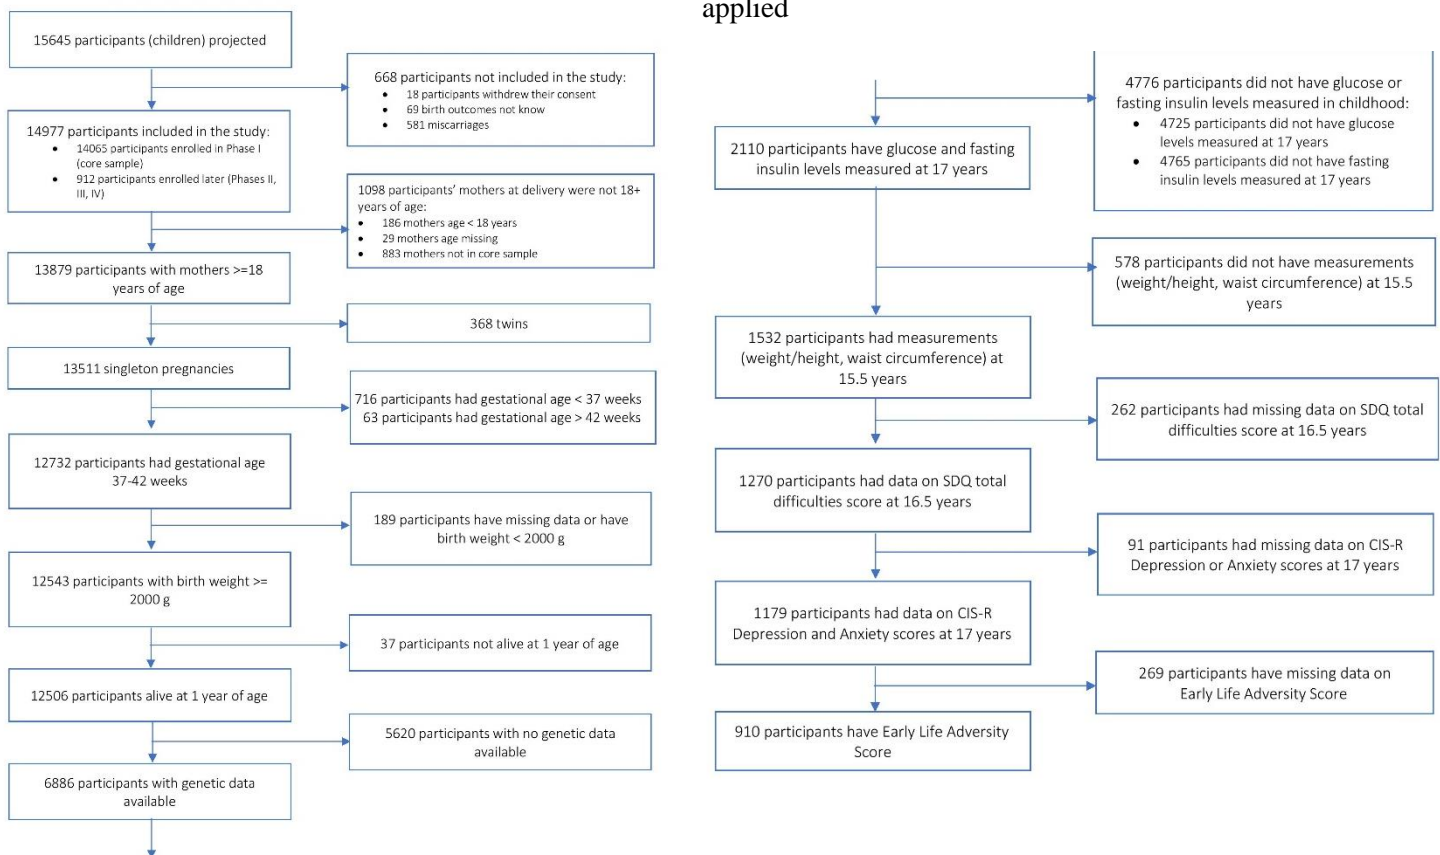

**Supplementary Figure 2. ALSPAC Sample size block scheme for each inclusion and exclusion criteria applied.** Block scheme depicting each step of inclusion and exclusion criteria applied to the original sample (N=15,645) until reaching final sample size for main hypothesis testing (N=910).



**Supplementary Figure 3.** Comorbidity risk clusters - ALSPAC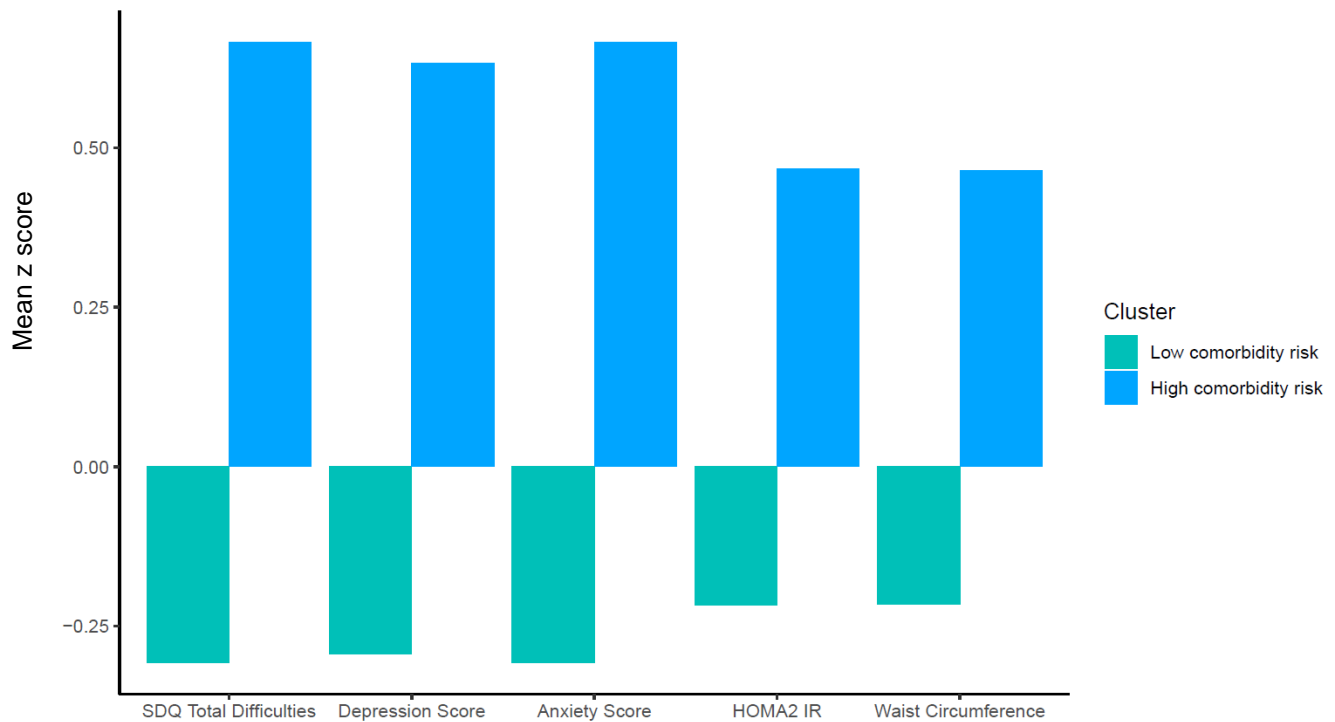

**Supplementary Figure 3. Comorbidity risk clusters - ALSPAC.** Cluster 1 (N=627) and 2 (N=283) mean z score values for the variables considered in the cluster analysis. Cluster high comorbidity risk represents the psychiatric and metabolic comorbidity risk profile in adolescents. SDQ Total Difficulties is a computed score from the Strengths & Difficulties Questionnaire (SDQ). Depression and anxiety scores were computed from the Computerized Interview Schedule – Revised (CIS-R). Homeostatic Model Assessment of Insulin Resistance (HOMA-IR), was computed using the HOMA2 calculation tool. Waist circumference was measured in centimeters. Clustering of these variables was performed using the *mclust* on R. The resulting cluster membership for each individual was treated as a categorical variable (“yes” or “no” comorbidity) and tested as a main outcome.

**Supplementary Figure 4.** Volume of gray matter and participant's age in the UK Biobank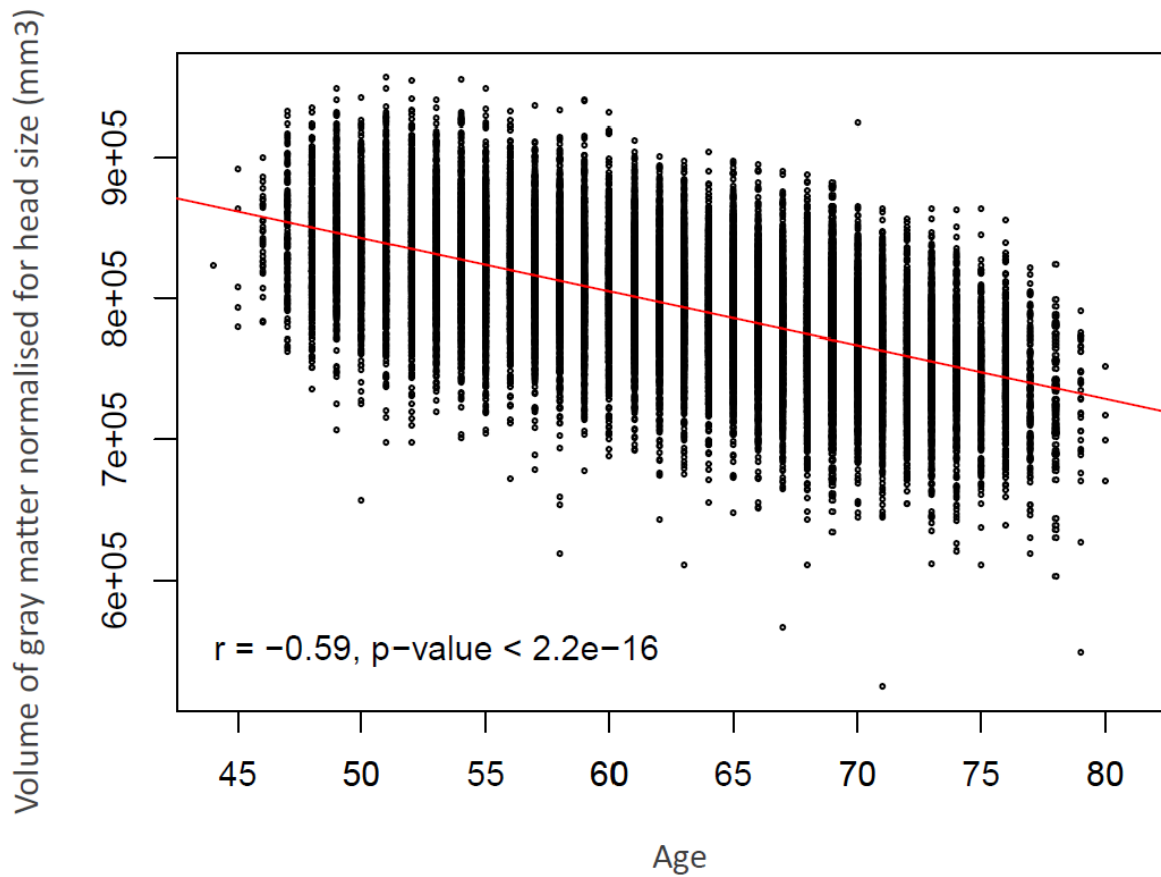

**Supplementary Figure 4. Volume of gray matter and participant's age in the UK Biobank.** Pearson correlation analysis demonstrates a significant negative correlation (red line) between the volume of gray matter and the participant's age. The y axis contains the values for gray matter volume normalized for head size (mm<sup>3</sup>) for each participant from the UK Biobank cohort; the x axis represents the participant's age at scanning.

**Supplementary Figure 5. Mesocorticolimbic DAT1 gene network enrichment analysis**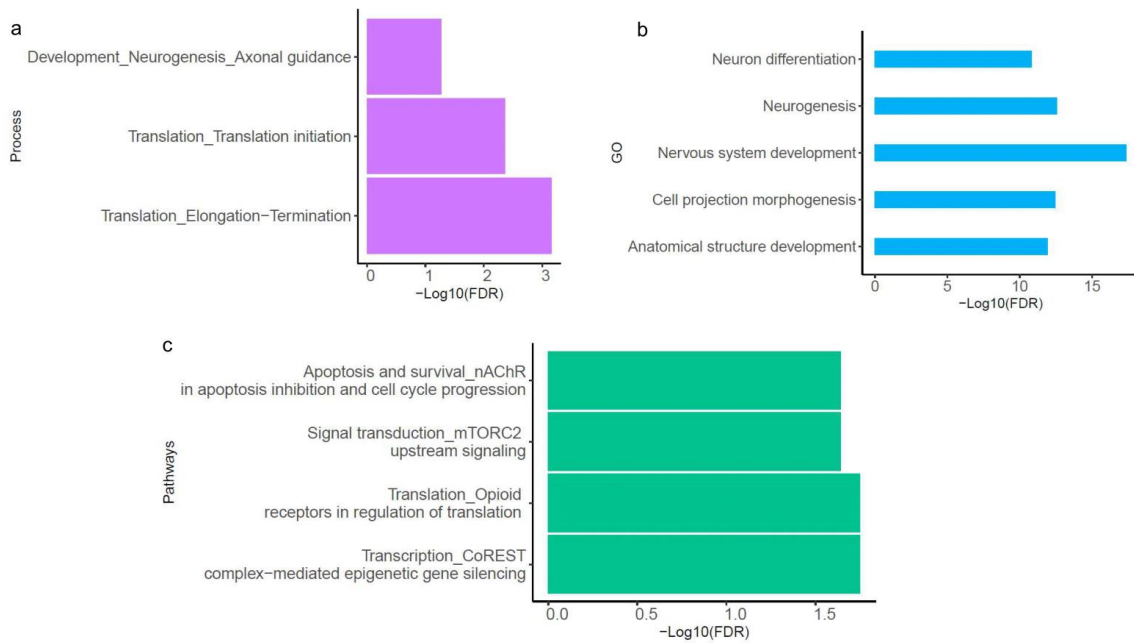

**Supplementary Figure 5. Mesocorticolimbic DAT1 gene network enrichment analysis.** **a**, Network Processes, **b**, Gene Ontology Processes and **c**, Pathway Maps related to genes included in mesocorticolimbic DAT1 gene network. Enrichment was performed using MetaCore®. FDR values were  $-\log_{10}$  normalized for better visualization.

**Supplementary Table 1.** Genes selected to compose the mesocorticolimbic DAT1 ePRS genetic score.

| Gene    | Ensembl         | Description                                                  |
|---------|-----------------|--------------------------------------------------------------|
| ABCA1   | ENSG00000165029 | ATP binding cassette subfamily A member 1                    |
| ACTL6A  | ENSG00000136518 | actin like 6A                                                |
| ADAMTS9 | ENSG00000163638 | ADAM metalloproteinase with thrombospondin type 1 motif 9    |
| ADORA2A | ENSG00000128271 | adenosine A2a receptor                                       |
| AFF3    | ENSG00000144218 | AF4/FMR2 family member 3                                     |
| AGBL5   | ENSG00000084693 | ATP/GTP binding protein like 5                               |
| AGRN    | ENSG00000188157 | agrin                                                        |
| AKAP7   | ENSG00000118507 | A-kinase anchoring protein 7                                 |
| AMBRA1  | ENSG00000110497 | autophagy and beclin 1 regulator 1                           |
| AP3M1   | ENSG00000185009 | adaptor related protein complex 3 subunit mu 1               |
| APC     | ENSG00000134982 | APC regulator of WNT signaling pathway                       |
| APC2    | ENSG00000115266 | APC regulator of WNT signaling pathway 2                     |
| ARL4C   | ENSG00000188042 | ADP ribosylation factor like GTPase 4C                       |
| ASPM    | ENSG00000066279 | abnormal spindle microtubule assembly                        |
| ASXL3   | ENSG00000141431 | ASXL transcriptional regulator 3                             |
| AUTS2   | ENSG00000158321 | activator of transcription and developmental regulator AUTS2 |
| BACH2   | ENSG00000112182 | BTB domain and CNC homolog 2                                 |
| BBC3    | ENSG00000105327 | BCL2 binding component 3                                     |
| BCL11A  | ENSG00000119866 | BAF chromatin remodeling complex subunit BCL11A              |
| BCL11B  | ENSG00000127152 | BAF chromatin remodeling complex subunit BCL11B              |
| BCL7A   | ENSG00000110987 | BAF chromatin remodeling complex subunit BCL7A               |
| BCL9L   | ENSG00000186174 | BCL9 like                                                    |

|         |                 |                                                |
|---------|-----------------|------------------------------------------------|
| BMF     | ENSG00000104081 | Bcl2 modifying factor                          |
| BRD1    | ENSG00000100425 | bromodomain containing 1                       |
| BRD4    | ENSG00000141867 | bromodomain containing 4                       |
| BTBD7   | ENSG00000277222 | BTB domain containing 7                        |
| BTF3    | ENSG00000145741 | basic transcription factor 3                   |
| BTF3L4  | ENSG00000134717 | basic transcription factor 3 like 4            |
| CBX2    | ENSG00000173894 | chromobox 2                                    |
| CCDC12  | ENSG00000160799 | coiled-coil domain containing 12               |
| CCDC138 | ENSG00000163006 | coiled-coil domain containing 138              |
| CCNB2   | ENSG00000157456 | cyclin B2                                      |
| CCT3    | ENSG00000163468 | chaperonin containing TCP1 subunit 3           |
| CCT4    | ENSG00000115484 | chaperonin containing TCP1 subunit 4           |
| CDH10   | ENSG00000040731 | cadherin 10                                    |
| CDK19   | ENSG00000155111 | cyclin dependent kinase 19                     |
| CECR2   | ENSG00000099954 | CECR2 histone acetyl-lysine reader             |
| CENPF   | ENSG00000117724 | centromere protein F                           |
| CEP170  | ENSG00000276725 | centrosomal protein 170                        |
| CEP57   | ENSG00000166037 | centrosomal protein 57                         |
| CIB2    | ENSG00000136425 | calcium and integrin binding family member 2   |
| CKLF    | ENSG00000217555 | chemokine like factor                          |
| CKS2    | ENSG00000123975 | CDC28 protein kinase regulatory subunit 2      |
| CLIC1   | ENSG00000213719 | chloride intracellular channel 1               |
| COL25A1 | ENSG00000188517 | collagen type XXV alpha 1 chain                |
| COTL1   | ENSG00000103187 | coactosin like F-actin binding protein 1       |
| CTTNBP2 | ENSG00000077063 | cortactin binding protein 2                    |
| CUEDC2  | ENSG00000107874 | CUE domain containing 2                        |
| CUX1    | ENSG00000257923 | cut like homeobox 1                            |
| CXADR   | ENSG00000154639 | CXADR Ig-like cell adhesion molecule           |
| CYP26A1 | ENSG00000095596 | cytochrome P450 family 26 subfamily A member 1 |

|          |                 |                                                               |
|----------|-----------------|---------------------------------------------------------------|
| DAAM1    | ENSG00000100592 | dishevelled associated activator of morphogenesis 1           |
| DAB1     | ENSG00000173406 | DAB adaptor protein 1                                         |
| DACT1    | ENSG00000165617 | dishevelled binding antagonist of beta catenin 1              |
| DCC      | ENSG00000187323 | DCC netrin 1 receptor                                         |
| DDR1     | ENSG00000204580 | discoidin domain receptor tyrosine kinase 1                   |
| DDX6     | ENSG00000110367 | DEAD-box helicase 6                                           |
| DEK      | ENSG00000124795 | DEK proto-oncogene                                            |
| DLX6-AS1 | ENSG00000231764 | DLX6 antisense RNA 1                                          |
| DNAJB5   | ENSG00000137094 | DnaJ heat shock protein family (Hsp40) member B5              |
| DNMT3B   | ENSG00000088305 | DNA methyltransferase 3 beta                                  |
| DOLPP1   | ENSG00000167130 | dolichyldiphosphatase 1                                       |
| DPEP1    | ENSG00000015413 | dipeptidase 1                                                 |
| DUSP23   | ENSG00000158716 | dual specificity phosphatase 23                               |
| EEF1B2   | ENSG00000114942 | eukaryotic translation elongation factor 1 beta 2             |
| EEF1D    | ENSG00000273594 | eukaryotic translation elongation factor 1 delta              |
| EIF4EBP2 | ENSG00000148730 | eukaryotic translation initiation factor 4E binding protein 2 |
| ELAVL3   | ENSG00000196361 | ELAV like RNA binding protein 3                               |
| ELF2     | ENSG00000109381 | E74 like ETS transcription factor 2                           |
| ENO3     | ENSG00000108515 | enolase 3                                                     |
| EPB41    | ENSG00000159023 | erythrocyte membrane protein band 4.1                         |
| EPHA5    | ENSG00000145242 | EPH receptor A5                                               |
| EPHA7    | ENSG00000135333 | EPH receptor A7                                               |
| EPHB2    | ENSG00000133216 | EPH receptor B2                                               |
| EPHB4    | ENSG00000196411 | EPH receptor B4                                               |
| EPS8     | ENSG00000151491 | epidermal growth factor receptor pathway substrate            |

|        |                 |                                                |
|--------|-----------------|------------------------------------------------|
|        |                 | 8                                              |
| ETV4   | ENSG00000175832 | ETS variant transcription factor 4             |
| EXOC4  | ENSG00000131558 | exocyst complex component 4                    |
| EXOSC4 | ENSG00000178896 | exosome component 4                            |
| EZR    | ENSG00000092820 | ezrin                                          |
| FANCC  | ENSG00000158169 | FA complementation group C                     |
| FBXW9  | ENSG00000132004 | F-box and WD repeat domain containing 9        |
| FCHSD2 | ENSG00000137478 | FCH and double SH3 domains 2                   |
| FGF11  | ENSG00000283903 | fibroblast growth factor 11                    |
| FHL3   | ENSG00000183386 | four and a half LIM domains 3                  |
| FJX1   | ENSG00000179431 | four-jointed box kinase 1                      |
| FKBP7  | ENSG00000079150 | FKBP prolyl isomerase 7                        |
| FOXN3  | ENSG00000053254 | forkhead box N3                                |
| FUBP1  | ENSG00000162613 | far upstream element binding protein 1         |
| FUS    | ENSG00000089280 | FUS RNA binding protein                        |
| FYN    | ENSG00000010810 | FYN proto-oncogene, Src family tyrosine kinase |
| GBX2   | ENSG00000168505 | gastrulation brain homeobox 2                  |
| GDI2   | ENSG00000057608 | GDP dissociation inhibitor 2                   |
| GFER   | ENSG00000127554 | growth factor, augments liver regeneration     |
| GFRA2  | ENSG00000168546 | GDNF family receptor alpha 2                   |
| GNA13  | ENSG00000120063 | G protein subunit alpha 13                     |
| GNB1   | ENSG00000078369 | G protein subunit beta 1                       |
| GNG4   | ENSG00000168243 | G protein subunit gamma 4                      |
| GPD2   | ENSG00000115159 | glycerol-3-phosphate dehydrogenase 2           |
| GPM6A  | ENSG00000150625 | glycoprotein M6A                               |
| GPR85  | ENSG00000164604 | G protein-coupled receptor 85                  |
| GPSM1  | ENSG00000160360 | G protein signaling modulator 1                |
| GRIP1  | ENSG00000155974 | glutamate receptor interacting protein 1       |
| GRWD1  | ENSG00000105447 | glutamate rich WD repeat containing 1          |

|          |                 |                                                        |
|----------|-----------------|--------------------------------------------------------|
| GTSE1    | ENSG00000075218 | G2 and S-phase expressed 1                             |
| GUCY1A2  | ENSG00000152402 | guanylate cyclase 1 soluble subunit alpha 2            |
| HDAC2    | ENSG00000196591 | histone deacetylase 2                                  |
| HEBP2    | ENSG00000051620 | heme binding protein 2                                 |
| HIST3H2A | ENSG00000181218 | H2A.W histone                                          |
| HNRNPA1  | ENSG00000135486 | heterogeneous nuclear ribonucleoprotein A1             |
| HNRNPK   | ENSG00000165119 | heterogeneous nuclear ribonucleoprotein K              |
| HNRNPR   | ENSG00000125944 | heterogeneous nuclear ribonucleoprotein R              |
| ICK      | ENSG00000112144 | intestinal cell kinase                                 |
| IER5L    | ENSG00000188483 | immediate early response 5 like                        |
| IGFBPL1  | ENSG00000137142 | insulin like growth factor binding protein like 1      |
| IL7      | ENSG00000104432 | interleukin 7                                          |
| IMPDH1   | ENSG00000106348 | inosine monophosphate dehydrogenase 1                  |
| INHBB    | ENSG00000163083 | inhibin subunit beta B                                 |
| IPMK     | ENSG00000151151 | inositol polyphosphate multikinase                     |
| ITGA5    | ENSG00000161638 | integrin subunit alpha 5                               |
| JARID2   | ENSG00000008083 | jumonji and AT-rich interaction domain containing 2    |
| KCTD11   | ENSG00000213859 | potassium channel tetramerization domain containing 11 |
| KDM1A    | ENSG00000004487 | lysine demethylase 1A                                  |
| KDM4A    | ENSG00000066135 | lysine demethylase 4A                                  |
| KIAA1549 | ENSG00000122778 | KIAA1549                                               |
| KIF15    | ENSG00000163808 | kinesin family member 15                               |
| KIF2C    | ENSG00000142945 | kinesin family member 2C                               |
| KIF7     | ENSG00000166813 | kinesin family member 7                                |
| KLF12    | ENSG00000118922 | Kruppel like factor 12                                 |
| KLF3     | ENSG00000109787 | Kruppel like factor 3                                  |
| KLF6     | ENSG00000067082 | Kruppel like factor 6                                  |
| KLHL23   | ENSG00000213160 | kelch like family member 23                            |



|        |                 |                                                       |
|--------|-----------------|-------------------------------------------------------|
| KLHL7  | ENSG00000122550 | kelch like family member 7                            |
| KLHL8  | ENSG00000145332 | kelch like family member 8                            |
| KRT18  | ENSG00000111057 | keratin 18                                            |
| LAMC1  | ENSG00000135862 | laminin subunit gamma 1                               |
| LASP1  | ENSG00000002834 | LIM and SH3 protein 1                                 |
| LRP12  | ENSG00000147650 | LDL receptor related protein 12                       |
| LRRC40 | ENSG00000066557 | leucine rich repeat containing 40                     |
| LRRC7  | ENSG00000033122 | leucine rich repeat containing 7                      |
| LSS    | ENSG00000160285 | lanosterol synthase                                   |
| LZIC   | ENSG00000162441 | leucine zipper and CTNNBIP1 domain containing         |
| MAPRE1 | ENSG00000101367 | microtubule associated protein RP/EB family member 1  |
| MARCKS | ENSG00000277443 | myristoylated alanine rich protein kinase C substrate |
| MAST2  | ENSG00000086015 | microtubule associated serine/threonine kinase 2      |
| MBTD1  | ENSG00000011258 | mbt domain containing 1                               |
| MCM2   | ENSG00000073111 | minichromosome maintenance complex component 2        |
| MCM5   | ENSG00000100297 | minichromosome maintenance complex component 5        |
| MFAP2  | ENSG00000117122 | microfibril associated protein 2                      |
| MIF    | ENSG00000240972 | macrophage migration inhibitory factor                |
| MKRN1  | ENSG00000133606 | makorin ring finger protein 1                         |
| MLLT11 | ENSG00000213190 | MLLT11 transcription factor 7 cofactor                |
| MLLT3  | ENSG00000171843 | MLLT3 super elongation complex subunit                |
| MMP16  | ENSG00000156103 | matrix metalloproteinase 16                           |
| MOSPD3 | ENSG00000106330 | motile sperm domain containing 3                      |
| MSI1   | ENSG00000135097 | musashi RNA binding protein 1                         |
| MTA1   | ENSG00000182979 | metastasis associated 1                               |

|           |                 |                                                 |
|-----------|-----------------|-------------------------------------------------|
| MTSS1     | ENSG00000170873 | MTSS I-BAR domain containing 1                  |
| MYD88     | ENSG00000172936 | MYD88 innate immune signal transduction adaptor |
| MYL6      | ENSG00000092841 | myosin light chain 6                            |
| MYNN      | ENSG00000085274 | myoneurin                                       |
| NASP      | ENSG00000132780 | nuclear autoantigenic sperm protein             |
| NBEAL1    | ENSG00000144426 | neurobeachin like 1                             |
| NCAPH     | ENSG00000121152 | non-SMC condensin I complex subunit H           |
| NES       | ENSG00000132688 | nestin                                          |
| NFIA      | ENSG00000162599 | nuclear factor I A                              |
| NHSL1     | ENSG00000135540 | NHS like 1                                      |
| NIPSNAP3A | ENSG00000136783 | nipsnap homolog 3A                              |
| NLGN1     | ENSG00000169760 | neuroligin 1                                    |
| NLN       | ENSG00000123213 | neurolysin                                      |
| NOL4      | ENSG00000101746 | nucleolar protein 4                             |
| NPM1      | ENSG00000181163 | nucleophosmin 1                                 |
| NPTXR     | ENSG00000221890 | neuronal pentraxin receptor                     |
| NTHL1     | ENSG00000065057 | nth like DNA glycosylase 1                      |
| NUP205    | ENSG00000155561 | nucleoporin 205                                 |
| NXN       | ENSG00000281300 | nucleoredoxin                                   |
| NXPH4     | ENSG00000182379 | neurexophilin 4                                 |
| ODC1      | ENSG00000115758 | ornithine decarboxylase 1                       |
| PACS1     | ENSG00000175115 | phosphofurin acidic cluster sorting protein 1   |
| PANK1     | ENSG00000152782 | pantothenate kinase 1                           |
| PANK3     | ENSG00000120137 | pantothenate kinase 3                           |
| PANX1     | ENSG00000110218 | pannexin 1                                      |
| PBX1      | ENSG00000185630 | PBX homeobox 1                                  |
| PDAP1     | ENSG00000106244 | PDGFA associated protein 1                      |
| PDE10A    | ENSG00000112541 | phosphodiesterase 10A                           |
| PDE4D     | ENSG00000113448 | phosphodiesterase 4D                            |
|           |                 | phosphatidylethanolamine N- methyltransferase   |

|         |                 |                                                                         |
|---------|-----------------|-------------------------------------------------------------------------|
| PEMT    | ENSG00000133027 |                                                                         |
| PHF21A  | ENSG00000135365 | PHD finger protein 21A                                                  |
| PIAS4   | ENSG00000105229 | protein inhibitor of activated STAT 4                                   |
| PIK3CA  | ENSG00000121879 | phosphatidylinositol-4,5-bisphosphate 3- kinase catalytic subunit alpha |
| PITPNC1 | ENSG00000154217 | phosphatidylinositol transfer protein cytoplasmic 1                     |
| PKLR    | ENSG00000143627 | pyruvate kinase L/R                                                     |
| PMF1    | ENSG00000160783 | polyamine modulated factor 1                                            |
| PNMT    | ENSG00000141744 | phenylethanolamine N-methyltransferase                                  |
| POLR3D  | ENSG00000168495 | RNA polymerase III subunit D                                            |
| PPP1R35 | ENSG00000160813 | protein phosphatase 1 regulatory subunit 35                             |
| PPP2R5E | ENSG00000154001 | protein phosphatase 2 regulatory subunit B'epsilon                      |
| PPP4C   | ENSG00000149923 | protein phosphatase 4 catalytic subunit                                 |
| PRPF40A | ENSG00000196504 | pre-mRNA processing factor 40 homolog A                                 |
| PRR5    | ENSG00000186654 | proline rich 5                                                          |
| PTBP1   | ENSG00000011304 | polypyrimidine tract binding protein 1                                  |
| PTPN9   | ENSG00000169410 | protein tyrosine phosphatase non-receptor type 9                        |
| QARS    | ENSG00000172053 | glutamyl-tRNA synthetase 1                                              |
| RAB11B  | ENSG00000185236 | RAB11B, member RAS oncogene family                                      |
| RALA    | ENSG00000006451 | RAS like proto-oncogene A                                               |
| RALGPS2 | ENSG00000116191 | Ral GEF with PH domain and SH3 binding motif 2                          |
| RAVER1  | ENSG00000161847 | ribonucleoprotein, PTB binding 1                                        |
| RBBP4   | ENSG00000162521 | RB binding protein 4, chromatin remodeling factor                       |
| RBM12   | ENSG00000244462 | RNA binding motif protein 12                                            |
| RBM42   | ENSG00000126254 | RNA binding motif protein 42                                            |
| RCC1    | ENSG00000180198 | regulator of chromosome condensation 1                                  |

|        |                 |                                               |
|--------|-----------------|-----------------------------------------------|
| RLF    | ENSG00000117000 | rearranged L-myc fusion                       |
| RNF122 | ENSG00000133874 | ring finger protein 122                       |
| RNF138 | ENSG00000134758 | ring finger protein 138                       |
| RNF165 | ENSG00000141622 | ring finger protein 165                       |
| RNF180 | ENSG00000164197 | ring finger protein 180                       |
| RNF2   | ENSG00000121481 | ring finger protein 2                         |
| ROBO1  | ENSG00000169855 | roundabout guidance receptor 1                |
| ROBO2  | ENSG00000185008 | roundabout guidance receptor 2                |
| RP9    | ENSG00000164610 | RP9 pre-mRNA splicing factor                  |
| RPL13  | ENSG00000167526 | ribosomal protein L13                         |
| RPL13A | ENSG00000142541 | ribosomal protein L13a                        |
| RPL14  | ENSG00000188846 | ribosomal protein L14                         |
| RPL26  | ENSG00000161970 | ribosomal protein L26                         |
| RPL27  | ENSG00000131469 | ribosomal protein L27                         |
| RPL30  | ENSG00000156482 | ribosomal protein L30                         |
| RPL37A | ENSG00000197756 | ribosomal protein L37a                        |
| RPS10  | ENSG00000124614 | ribosomal protein S10                         |
| RPS12  | ENSG00000112306 | ribosomal protein S12                         |
| RPS13  | ENSG00000110700 | ribosomal protein S13                         |
| RPS18  | ENSG00000227794 | ribosomal protein S18                         |
| RPS20  | ENSG00000008988 | ribosomal protein S20                         |
| RPS21  | ENSG00000171858 | ribosomal protein S21                         |
| RPS6   | ENSG00000137154 | ribosomal protein S6                          |
| RRM1   | ENSG00000167325 | ribonucleotide reductase catalytic subunit M1 |
| RSL1D1 | ENSG00000171490 | ribosomal L1 domain containing 1              |
| RSPRY1 | ENSG00000159579 | ring finger and SPRY domain containing 1      |
| SARM1  | ENSG00000004139 | sterile alpha and TIR motif containing 1      |
| SBF2   | ENSG00000133812 | SET binding factor 2                          |
| SCGN   | ENSG00000079689 | secretagogin, EF-hand calcium binding protein |
| SCN3A  | ENSG00000153253 | sodium voltage-gated channel alpha subunit 3  |

|         |                 |                                                                                                   |
|---------|-----------------|---------------------------------------------------------------------------------------------------|
| SCRT2   | ENSG00000215397 | scratch family transcriptional repressor 2                                                        |
| SCYL2   | ENSG00000136021 | SCY1 like pseudokinase 2                                                                          |
| SDC3    | ENSG00000162512 | syndecan 3                                                                                        |
| SDCCAG8 | ENSG00000054282 | serologically defined colon cancer antigen 8                                                      |
| SEC11A  | ENSG00000140612 | SEC11 homolog A, signal peptidase complex subunit                                                 |
| SEMA3F  | ENSG00000001617 | semaphorin 3F                                                                                     |
| SERINC2 | ENSG00000168528 | serine incorporator 2                                                                             |
| SEZ6    | ENSG00000063015 | seizure related 6 homolog                                                                         |
| SF3B4   | ENSG00000143368 | splicing factor 3b subunit 4                                                                      |
| SFPQ    | ENSG00000116560 | splicing factor proline and glutamine rich                                                        |
| SH3GLB1 | ENSG00000097033 | SH3 domain containing GRB2 like, endophilin B1                                                    |
| SKA2    | ENSG00000182628 | spindle and kinetochore associated complex subunit 2                                              |
| SLC1A5  | ENSG00000105281 | solute carrier family 1 member 5                                                                  |
| SLC39A6 | ENSG00000141424 | solute carrier family 39 member 6                                                                 |
| SLC43A3 | ENSG00000134802 | solute carrier family 43 member 3                                                                 |
| SLCO5A1 | ENSG00000137571 | solute carrier organic anion transporter family member 5A1                                        |
| SMAD1   | ENSG00000170365 | SMAD family member 1                                                                              |
| SMAP1   | ENSG00000112305 | small ArfGAP 1                                                                                    |
| SMARCD1 | ENSG00000066117 | SWI/SNF related, matrix associated, actin dependent regulator of chromatin, subfamily d, member 1 |
| SMCHD1  | ENSG00000101596 | structural maintenance of chromosomes flexible hinge domain containing 1                          |

**Supplementary Table 2.** Adjusted means of variables used in the cluster analysis for the ALSPAC cohort.

|                                  | Cluster - Low comorbidity risk |      | Cluster – High comorbidity risk |      | P-value |
|----------------------------------|--------------------------------|------|---------------------------------|------|---------|
|                                  | Mean                           | SE   | Mean                            | SE   |         |
| SDQ Total Difficulties           | -0.30                          | 0.03 | 0.68                            | 0.05 | p<0.001 |
| Depression Score <sup>a</sup>    | -0.29                          | 0.03 | 0.62                            | 0.05 | p<0.001 |
| Anxiety Score                    | -0.30                          | 0.03 | 0.67                            | 0.05 | p<0.001 |
| HOMA2-IR                         | -0.21                          | 0.03 | 0.47                            | 0.05 | p<0.001 |
| Waist Circumference <sup>b</sup> | -0.21                          | 0.03 | 0.46                            | 0.05 | p<0.001 |
|                                  | N=627                          |      | N=283                           |      |         |

*Note: covariates considered: sex and SES*

<sup>a</sup> Significant difference was observed for sex,  $F(1,891)= 6.461, p=0.011$  between high and low comorbidity risk groups

<sup>b</sup> Significant difference was observed for sex,  $F(1,891)= 6.015, p=0.014$  between high and low comorbidity risk groups

**Supplementary Table 3.** The most significantly linked pair of neuroimage and genetic components for every age band.

| Age band     | Linked pair of independent components   | Correlation coefficient | Correlation between components P-value | Total Sample size |
|--------------|-----------------------------------------|-------------------------|----------------------------------------|-------------------|
| 40 to 45 yrs | SNP component: 63<br>MRI component: 27  | 0.23                    | 8.09e-20                               | 1505              |
| 46 to 50 yrs | SNP component: 42<br>MRI component: 1*  | 0.28                    | 1.51e-34                               | 1730              |
| 51 to 55 yrs | SNP component: 44*<br>MRI component: 37 | -0.23                   | 6.85e-26                               | 1944              |
| 56 to 60 yrs | SNP component: 39<br>MRI component: 17  | -0.23                   | 8.67e-27                               | 2105              |
| 61 to 65 yrs | SNP component: 50<br>MRI component: 21  | -0.28                   | 5.91e-29                               | 1493              |
| 66 to 70 yrs | SNP component: 15<br>MRI component: 29* | -0.50                   | 2.35e-34                               | 514               |

\* A significant adversity effect was observed in these components when comparing component loading coefficients for early adversity and no early adversity groups.

**Supplementary Table 4.** Significant SNPs ( $|Z| > 2.5$ ) from mesocorticolimbic DAT1 ePRS associated with the neuroimaging components for every age band.

| Age band 40 to 45 yrs |                      | Age band 46 to 50 yrs |                      | Age band 51 to 55 yrs |                      | Age band 56 to 60 yrs |                      | Age band 61 to 65 yrs |                      | Age band 66 to 70 yrs |                      |
|-----------------------|----------------------|-----------------------|----------------------|-----------------------|----------------------|-----------------------|----------------------|-----------------------|----------------------|-----------------------|----------------------|
| SNP Component 63      |                      | SNP Component 42      |                      | SNP Component 44      |                      | SNP Component 39      |                      | SNP Component 50      |                      | SNP Component 15      |                      |
| <i>SNPs</i>           | <i>Loading Coef.</i> | <i>SNPs</i>           | <i>Loading Coef.</i> | <i>SNPs</i>           | <i>Loading Coef.</i> | <i>SNPs</i>           | <i>Loading Coef.</i> | <i>SNPs</i>           | <i>Loading Coef.</i> | <i>SNPs</i>           | <i>Loading Coef.</i> |
| rs3211663             | -27.325              | rs78395954            | 25.543               | rs144039224           | 23.638               | rs17215231            | 26.753               | rs10512333            | 47.356               | rs78395954            | 19.710               |
| rs184180733           | 20.619               | rs116998176           | -17.688              | rs116717855           | 21.249               | rs15087               | 24.220               | rs113647163           | 27.309               | rs3894776             | 16.694               |
| rs139834560           | 20.403               | rs148918967           | -17.636              | rs3762272             | 21.040               | rs145650486           | -19.561              | rs17215231            | 26.166               | rs111649180           | 15.692               |
| rs12920969            | -18.594              | rs9467573             | 13.601               | rs193267099           | 17.629               | rs28564089            | 19.498               | rs117323391           | 17.321               | rs116717855           | 13.080               |
| rs41309308            | 15.327               | rs145071781           | -12.930              | rs9358867             | -15.695              | rs401394              | -14.367              | rs12920969            | -17.257              | rs13430705            | -11.680              |
| rs8177971             | 12.284               | rs140931342           | 11.842               | rs142047277           | 13.200               | rs1629664             | -11.919              | rs2298694             | -14.319              | rs71413857            | -10.402              |
| rs3762272             | 11.386               | rs4647394             | -11.532              | rs10263870            | 12.308               | rs3762272             | 11.802               | rs4743758             | 13.773               | rs11947505            | 9.481                |
| rs10263870            | 10.910               | rs10263870            | 11.405               | rs725332              | 11.751               | rs145071781           | -11.540              | rs725332              | -12.303              | rs113647163           | -9.348               |
| rs10088105            | 10.861               | rs3762272             | 11.176               | rs145728372           | 10.867               | rs76753172            | 11.473               | rs184180733           | -10.326              | rs10263870            | -9.323               |
| rs138818              | 10.792               | rs1504310             | -10.784              | rs10802904            | -10.834              | rs73076560            | -10.743              | rs145650486           | 10.154               | rs71517255            | 9.136                |
| rs11637595            | -8.271               | rs17579352            | 10.774               | rs138818              | -9.838               | rs351343              | -10.302              | rs213204              | 9.883                | rs190264799           | 8.574                |
| rs9652856             | -8.194               | rs55779933            | 10.484               | rs117402521           | 9.342                | rs10263870            | 10.111               | rs145728372           | 9.056                | rs11637595            | -8.403               |
| rs401394              | -7.933               | rs4790714             | -10.049              | rs111548256           | 9.286                | rs193267099           | 9.418                | rs9467573             | -8.649               | rs77303187            | 8.350                |
| rs147767243           | 7.836                | rs185177951           | -9.341               | rs10512333            | 9.143                | rs140819465           | -8.957               | rs3758294             | -8.240               | rs146111043           | -8.054               |



|             |        |             |        |             |        |             |        |             |        |             |        |
|-------------|--------|-------------|--------|-------------|--------|-------------|--------|-------------|--------|-------------|--------|
| rs2139455   | -7.686 | rs553959864 | 9.331  | rs10088105  | 9.136  | rs6749757   | 8.888  | rs142047277 | -7.847 | rs115864893 | -8.029 |
| rs4072555   | 7.509  | rs10512333  | 9.190  | rs73076560  | 8.942  | rs117128147 | -8.340 | rs3211663   | -7.766 | rs116998176 | -7.776 |
| rs13237311  | 7.390  | rs116717855 | 8.965  | rs74318291  | 8.558  | rs1785913   | -8.325 | rs111548256 | -7.195 | rs4308719   | -7.693 |
| rs72670627  | 7.364  | rs4743758   | 8.589  | rs76974812  | 8.532  | rs149268659 | 8.043  | rs41309308  | -7.092 | rs74318291  | -7.485 |
| rs12974962  | 7.352  | rs62018159  | -8.416 | rs61783205  | 8.500  | rs10275680  | -7.860 | rs140931342 | -7.020 | rs79942123  | 7.175  |
| rs6988177   | 7.108  | rs144977809 | 8.120  | rs148918967 | 8.371  | rs1014416   | 7.733  | rs73437201  | 6.477  | rs149268659 | 7.022  |
| rs138136669 | -7.100 | rs139834560 | -7.708 | rs11994203  | 7.765  | rs8179656   | -7.506 | rs524281    | 6.027  | rs3799146   | 6.762  |
| rs140958972 | 6.899  | rs74811295  | -7.647 | rs140656857 | -7.645 | rs148918967 | 7.453  | rs144876987 | -5.788 | rs401394    | 6.704  |
| rs142047277 | -6.628 | rs3134530   | -7.498 | rs145071781 | -7.364 | rs58583286  | 7.341  | rs2824350   | -5.725 | rs117979404 | 6.622  |
| rs140931342 | -6.605 | rs79087982  | -7.375 | rs192418723 | -7.344 | rs7638334   | -7.293 | rs79087982  | -5.585 | rs144876987 | 6.621  |
| rs725332    | -6.588 | rs140580063 | -7.242 | rs190645385 | -7.301 | rs78395954  | 7.220  | rs17435718  | -5.580 | rs4647394   | -6.329 |
| rs62455215  | 6.336  | rs41309308  | -6.992 | rs28564089  | -7.297 | rs524281    | -7.156 | rs1014416   | 5.468  | rs60319541  | -6.123 |
| rs112558177 | -6.319 | rs2284748   | 6.978  | rs146276817 | 7.162  | rs142047277 | 7.154  | rs142196672 | 5.398  | rs370079236 | 6.034  |
| rs61875269  | 6.245  | rs6942120   | -6.955 | rs140958972 | 7.156  | rs41309308  | 7.122  | rs11947505  | -5.204 | rs111503359 | 6.008  |
| rs2776077   | -6.110 | rs11030918  | 6.927  | rs60319541  | 6.874  | rs79942123  | 6.973  | rs1046115   | 5.177  | rs113495032 | -5.918 |
| rs524281    | 6.101  | rs10917313  | 6.915  | rs3741370   | 6.864  | rs150893744 | -6.766 | rs149268659 | -5.061 | rs73076560  | -5.848 |
| rs55839877  | -5.972 | rs117128147 | 6.873  | rs145650486 | -6.831 | rs213204    | 6.687  | rs17460074  | 5.060  | rs185177951 | 5.708  |
| rs113389788 | 5.938  | rs524281    | -6.650 | rs571413    | 6.800  | rs17372186  | 6.451  | rs12151996  | -4.997 | rs10512333  | 5.700  |
| rs75177707  | 5.858  | rs181971636 | 6.616  | rs139872992 | -6.799 | rs140580063 | -6.285 | rs12642875  | -4.891 | rs1504310   | -5.577 |

|             |        |             |        |             |        |             |        |             |        |             |        |
|-------------|--------|-------------|--------|-------------|--------|-------------|--------|-------------|--------|-------------|--------|
| rs2933075   | -5.773 | rs118154071 | 6.351  | rs4647394   | -6.694 | rs10514710  | 6.266  | rs75602357  | -4.825 | rs142715768 | -5.573 |
| rs139091288 | -5.391 | rs2776077   | -5.883 | rs2824350   | -6.656 | rs117402521 | -6.246 | rs11808886  | 4.688  | rs1629664   | -5.556 |
| rs117323391 | -5.390 | rs6908713   | 5.866  | rs2933075   | 6.615  | rs9365898   | 6.241  | rs142715768 | 4.607  | rs35172826  | 5.510  |
| rs190322101 | 5.376  | rs17215231  | -5.858 | rs4468      | -6.529 | rs75814235  | -6.217 | rs4737288   | -4.483 | rs114404643 | -5.484 |
| rs72923978  | 5.254  | rs149980545 | 5.858  | rs140819465 | 6.293  | rs75177707  | -6.200 | rs3134530   | -4.479 | rs62018159  | -5.342 |
| rs148345475 | -5.203 | rs12974962  | -5.786 | rs148273366 | -6.247 | rs13202762  | -6.096 | rs117854460 | 4.440  | rs138818    | 5.327  |
| rs147581282 | 5.200  | rs7165812   | -5.721 | rs11637595  | 5.985  | rs73437201  | 6.068  | rs117110314 | -4.410 | rs10088105  | 5.290  |
| rs553030    | 5.169  | rs12723359  | 5.716  | rs79835059  | 5.972  | rs7796916   | 5.897  | rs75177707  | -4.211 | rs2062858   | -5.271 |
| rs10275680  | 5.047  | rs140271797 | 5.678  | rs146111043 | -5.877 | rs79851445  | 5.838  | rs111736183 | 4.163  | rs17140826  | 5.253  |
| rs75290858  | 4.983  | rs3738696   | -5.660 | rs7638334   | 5.844  | rs116526056 | -5.727 | rs77728810  | 4.144  | rs72753256  | -5.225 |
| rs117932605 | 4.952  | rs11994203  | 5.496  | rs558548241 | -5.806 | rs117348380 | -5.711 | rs7338608   | 4.135  | rs117431686 | 5.220  |
| rs115864893 | 4.916  | rs73093571  | -5.488 | rs142196672 | 5.802  | rs140271797 | 5.708  | rs2284748   | -4.091 | rs16878122  | -5.167 |
| rs140656857 | -4.906 | rs12204127  | -5.374 | rs16936356  | 5.792  | rs9953722   | 5.609  | rs62396140  | 4.033  | rs77439453  | -5.157 |
| rs11808886  | 4.897  | rs12543736  | -5.321 | rs6949760   | 5.755  | rs2824350   | -5.566 | rs139872992 | 4.022  | rs74571033  | -5.150 |
| rs4730796   | -4.866 | rs75203411  | 5.212  | rs10275680  | 5.703  | rs9467573   | 5.485  | rs115264061 | -4.021 | rs147763162 | -5.141 |
| rs12662612  | 4.828  | rs6770763   | 5.210  | rs74788884  | 5.668  | rs12320689  | -5.439 | rs116732333 | -3.986 | rs6813392   | 5.103  |
| rs1257428   | -4.813 | rs226225    | 5.164  | rs1480022   | -5.665 | rs116732333 | -5.419 | rs72761751  | 3.970  | rs6818784   | 4.996  |
| rs146218495 | 4.786  | rs1046115   | -5.110 | rs11730581  | -5.613 | rs72923978  | -5.414 | rs2773080   | -3.947 | rs9365898   | -4.993 |
| rs144977809 | -4.691 | rs17435718  | 5.070  | rs566739    | 5.516  | rs67631072  | 5.402  | rs2189962   | 3.919  | rs553959864 | -4.993 |

|             |        |             |        |             |        |             |        |             |        |             |        |
|-------------|--------|-------------|--------|-------------|--------|-------------|--------|-------------|--------|-------------|--------|
| rs1050046   | 4.663  | rs73076560  | -5.035 | rs12342233  | -5.510 | rs16936356  | 5.125  | rs190724526 | 3.888  | rs524281    | -4.958 |
| rs12171130  | -4.651 | rs6517780   | -4.978 | rs74811295  | 5.507  | rs76974812  | 5.036  | rs11042613  | 3.887  | rs35986071  | 4.911  |
| rs141519089 | 4.614  | rs76990532  | 4.962  | rs3799146   | -5.344 | rs3211698   | -5.012 | rs12543736  | -3.877 | rs1575013   | 4.815  |
| rs75342996  | -4.611 | rs72817046  | -4.945 | rs118154071 | -5.276 | rs6908713   | 4.880  | rs117936086 | 3.708  | rs4142261   | -4.742 |
| rs1504310   | 4.578  | rs147634506 | 4.881  | rs117436375 | 5.225  | rs6688710   | 4.869  | rs76748266  | -3.708 | rs116275355 | 4.689  |
| rs220812    | -4.514 | rs144876987 | -4.867 | rs6749757   | -5.205 | rs55779933  | 4.856  | rs146276817 | -3.692 | rs4604150   | -4.680 |
| rs7095103   | -4.392 | rs143934748 | 4.809  | rs62455215  | 5.163  | rs11994203  | 4.775  | rs12924762  | 3.678  | rs17372186  | -4.665 |
| rs146111043 | -4.382 | rs116303796 | 4.806  | rs9652856   | 5.073  | rs571413    | 4.754  | rs117348380 | -3.668 | rs11653768  | 4.659  |
| rs79851445  | -4.360 | rs2011323   | 4.786  | rs150893744 | 5.039  | rs79269048  | 4.742  | rs78395954  | -3.636 | rs79043630  | 4.648  |
| rs59239472  | 4.354  | rs2824350   | -4.783 | rs187086310 | 5.022  | rs71653924  | -4.735 | rs147581282 | -3.587 | rs77206101  | -4.628 |
| rs116303796 | 4.301  | rs12810479  | -4.723 | rs117323391 | 5.004  | rs11612551  | 4.715  | rs116717855 | -3.569 | rs1014416   | 4.512  |
| rs149268659 | 4.300  | rs11856887  | -4.696 | rs12920969  | 4.993  | rs146218495 | -4.702 | rs75342996  | -3.519 | rs78929101  | -4.499 |
| rs2773080   | -4.239 | rs111503359 | -4.686 | rs55779933  | 4.950  | rs189802198 | 4.685  | rs117979404 | 3.445  | rs10797854  | 4.467  |
| rs146276817 | -4.198 | rs140656857 | 4.670  | rs147763162 | -4.805 | rs11207201  | -4.645 | rs15087     | -3.414 | rs142047277 | 4.420  |
| rs10091760  | 4.168  | rs144039224 | 4.649  | rs296891    | -4.787 | rs72817046  | 4.642  | rs55839877  | -3.379 | rs13063349  | 4.391  |
| rs144681951 | -4.160 | rs76974812  | 4.611  | rs6897073   | -4.696 | rs296891    | 4.624  | rs78929101  | 3.360  | rs113397349 | 4.384  |
| rs74318291  | 4.155  | rs2288549   | -4.556 | rs61819095  | 4.653  | rs76738271  | 4.544  | rs140819465 | -3.351 | rs1590153   | 4.363  |
| rs144196860 | -4.155 | rs7909879   | -4.533 | rs11843549  | 4.619  | rs117323391 | 4.528  | rs7220217   | -3.329 | rs115977303 | 4.339  |
| rs140618390 | 4.144  | rs1045373   | -4.528 | rs6782835   | -4.554 | rs2876862   | 4.526  | rs80173428  | -3.329 | rs60720150  | -4.327 |

|             |        |             |        |             |        |             |        |             |        |             |        |
|-------------|--------|-------------|--------|-------------|--------|-------------|--------|-------------|--------|-------------|--------|
| rs79341996  | 4.069  | rs296891    | -4.523 | rs17372186  | 4.536  | rs74318291  | 4.416  | rs10275680  | -3.315 | rs140931342 | 4.292  |
| rs145406815 | -4.067 | rs10922162  | 4.500  | rs11808886  | -4.490 | rs11176125  | 4.381  | rs61819095  | 3.278  | rs1785913   | 4.282  |
| rs11776420  | -4.063 | rs2111208   | -4.492 | rs590806    | -4.456 | rs190724526 | -4.377 | rs71413857  | -3.217 | rs117348380 | -4.241 |
| rs2876862   | -4.030 | rs17669125  | -4.457 | rs59634323  | 4.430  | rs146111043 | -4.371 | rs2933075   | -3.211 | rs17513112  | -4.241 |
| rs57695836  | -4.004 | rs62560522  | 4.455  | rs62408192  | 4.423  | rs140958972 | 4.323  | rs2139455   | -3.199 | rs112064630 | -4.219 |
| rs10443217  | -3.994 | rs11176312  | 4.432  | rs75342996  | 4.398  | rs117436375 | -4.309 | rs116708449 | -3.198 | rs28673141  | -4.193 |
| rs77439453  | 3.992  | rs79773941  | -4.385 | rs11612551  | -4.348 | rs973236    | 4.295  | rs35748153  | 3.162  | rs17286391  | -4.191 |
| rs10789545  | 3.955  | rs116850964 | -4.345 | rs150566466 | -4.288 | rs143611100 | -4.193 | rs3762272   | 3.118  | rs76311503  | -4.183 |
| rs3211694   | 3.923  | rs142196672 | -4.342 | rs2776077   | -4.262 | rs142504280 | 4.113  | rs118154071 | 3.094  | rs3884327   | -4.171 |
| rs116092966 | 3.893  | rs182081961 | 4.312  | rs16882205  | 4.181  | rs7095103   | -4.094 | rs142636042 | -3.089 | rs722923    | -4.122 |
| rs1629664   | -3.886 | rs147581282 | -4.302 | rs60720150  | 4.181  | rs190264799 | 4.081  | rs8036417   | 3.086  | rs34107624  | 4.104  |
| rs72829764  | -3.860 | rs74371873  | 4.287  | rs1046115   | 4.142  | rs13265739  | 4.016  | rs1862925   | 3.073  | rs13227545  | 4.078  |
| rs2274576   | -3.856 | rs17513112  | -4.257 | rs1785913   | -4.133 | rs11808886  | -3.976 | rs187412638 | -3.031 | rs55689300  | 4.060  |
| rs73093571  | 3.848  | rs72666163  | 4.223  | rs13265739  | -4.130 | rs12873770  | -3.943 | rs117897888 | 3.028  | rs180842835 | 4.048  |
| rs4743758   | 3.821  | rs73128871  | -4.183 | rs140618390 | -4.038 | rs78918308  | 3.911  | rs73076560  | -3.024 | rs11808886  | -4.047 |
| rs4308719   | 3.820  | rs147904652 | 4.170  | rs6688710   | -4.015 | rs73035766  | 3.905  | rs11776420  | -2.975 | rs17215231  | -4.012 |
| rs875590    | -3.787 | rs6988177   | 4.130  | rs74640671  | -3.981 | rs11612962  | -3.847 | rs74318291  | -2.973 | rs79185041  | -4.010 |
| rs79043630  | 3.786  | rs148273366 | 4.044  | rs10063228  | -3.941 | rs220812    | 3.847  | rs917022    | -2.959 | rs2914827   | -3.936 |
| rs78738472  | 3.785  | rs113583367 | -4.028 | rs1257428   | 3.904  | rs72670627  | -3.800 | rs142504280 | -2.947 | rs17492659  | -3.935 |

|             |        |             |        |             |        |             |        |             |        |             |        |
|-------------|--------|-------------|--------|-------------|--------|-------------|--------|-------------|--------|-------------|--------|
| rs72909243  | 3.768  | rs10088105  | -3.965 | rs147767243 | 3.890  | rs1862925   | -3.718 | rs11612551  | -2.930 | rs62091161  | 3.934  |
| rs4711092   | -3.732 | rs4711092   | -3.964 | rs115499442 | -3.876 | rs74811295  | 3.712  | rs34105866  | -2.923 | rs145563277 | -3.931 |
| rs2288549   | 3.729  | rs148318378 | -3.956 | rs73437201  | -3.866 | rs6728983   | -3.691 | rs76924012  | 2.889  | rs78475441  | -3.923 |
| rs35986071  | -3.722 | rs116280617 | 3.895  | rs11993990  | 3.862  | rs144039224 | 3.685  | rs112983023 | 2.876  | rs75602357  | 3.870  |
| rs296891    | -3.695 | rs62396140  | 3.893  | rs11718514  | -3.862 | rs142636042 | 3.666  | rs79851445  | -2.834 | rs56000485  | 3.847  |
| rs12204127  | 3.679  | rs147767243 | 3.884  | rs62396140  | -3.838 | rs2720262   | -3.656 | rs2062858   | -2.827 | rs6688710   | -3.828 |
| rs147359410 | -3.672 | rs13202762  | 3.852  | rs524300    | 3.836  | rs2011323   | 3.623  | rs10820732  | 2.811  | rs76942947  | 3.809  |
| rs76781091  | 3.666  | rs28906376  | -3.843 | rs140271797 | 3.808  | rs144876987 | -3.620 | rs150566466 | -2.778 | rs112370475 | -3.805 |
| rs6897073   | 3.641  | rs116732333 | 3.842  | rs6517780   | -3.786 | rs148480169 | -3.601 | rs13286392  | 2.772  | rs2189962   | 3.776  |
| rs13087237  | 3.577  | rs34832680  | -3.824 | rs10514710  | 3.777  | rs11774868  | 3.550  | rs12941788  | 2.767  | rs3738696   | -3.760 |
| rs7165812   | -3.521 | rs11072730  | -3.807 | rs145068927 | -3.772 | rs10789545  | 3.539  | rs1405948   | -2.750 | rs36081664  | -3.760 |
| rs11774868  | -3.515 | rs74788884  | -3.754 | rs11590982  | 3.758  | rs35386495  | -3.527 | rs78738472  | -2.743 | rs73026185  | -3.740 |
| rs113495032 | -3.510 | rs57778149  | -3.744 | rs115070660 | -3.756 | rs74571033  | 3.525  | rs189304512 | -2.743 | rs590806    | -3.738 |
| rs12406720  | -3.506 | rs1480010   | 3.738  | rs4604150   | -3.755 | rs60319541  | -3.508 | rs72670627  | -2.742 | rs9573276   | -3.737 |
| rs803070    | -3.487 | rs2377852   | 3.726  | rs11653768  | 3.686  | rs114180647 | 3.506  | rs79942123  | -2.704 | rs12342233  | -3.718 |
| rs12380720  | -3.483 | rs739439    | 3.711  | rs2237122   | 3.670  | rs187086310 | -3.483 | rs112558177 | 2.671  | rs12606083  | 3.717  |
| rs16882205  | -3.474 | rs139815108 | 3.709  | rs137953078 | -3.651 | rs61877041  | -3.444 | rs566739    | 2.657  | rs56080411  | 3.708  |
| rs146843341 | -3.469 | rs7796916   | -3.624 | rs9363058   | 3.611  | rs147634506 | 3.418  | rs12342233  | 2.653  | rs7775567   | 3.672  |
| rs11176125  | 3.467  | rs139356914 | -3.596 | rs117853367 | 3.597  | rs4142261   | 3.405  | rs11709697  | 2.644  | rs1394220   | 3.670  |

|             |        |             |        |             |        |             |        |             |        |             |        |
|-------------|--------|-------------|--------|-------------|--------|-------------|--------|-------------|--------|-------------|--------|
| rs145068927 | -3.465 | rs80182122  | -3.590 | rs114580747 | -3.516 | rs79902981  | 3.403  | rs71517255  | 2.608  | rs151010172 | -3.654 |
| rs71413857  | -3.456 | rs3799146   | -3.588 | rs7095103   | -3.513 | rs72752809  | 3.386  | rs17436893  | 2.605  | rs144196860 | -3.644 |
| rs13227545  | -3.443 | rs247860    | 3.562  | rs6942120   | -3.494 | rs72836521  | -3.381 | rs74865437  | -2.596 | rs571413    | 3.609  |
| rs13223275  | 3.434  | rs6728983   | 3.559  | rs77078256  | 3.459  | rs17140826  | 3.352  | rs113050428 | 2.584  | rs76738271  | 3.607  |
| rs2988268   | -3.433 | rs4053608   | 3.548  | rs28906376  | -3.451 | rs150446467 | 3.337  | rs193267099 | -2.583 | rs62408168  | 3.584  |
| rs6935101   | 3.422  | rs116092966 | -3.534 | rs12380720  | -3.387 | rs77728810  | -3.327 | rs35562243  | 2.582  | rs146276817 | -3.583 |
| rs4604150   | 3.405  | rs4885132   | -3.487 | rs2242586   | -3.356 | rs62101454  | -3.318 | rs147318384 | -2.579 | rs74320918  | -3.555 |
| rs111649180 | -3.393 | rs138605227 | 3.484  | rs189333988 | -3.343 | rs17669125  | 3.297  | rs4885132   | -2.576 | rs56100436  | -3.518 |
| rs73615605  | -3.373 | rs182635346 | 3.481  | rs12320689  | -3.319 | rs72685362  | 3.295  | rs11590982  | 2.569  | rs147220943 | -3.499 |
| rs11653768  | -3.353 | rs973236    | -3.449 | rs112613914 | 3.316  | rs711866    | -3.290 | rs62525862  | -2.566 | rs17579352  | 3.488  |
| rs72661791  | 3.349  | rs3735645   | -3.447 | rs73158989  | 3.316  | rs9483504   | -3.281 | rs7226740   | -2.563 | rs6782835   | -3.487 |
| rs10455804  | 3.337  | rs117431686 | 3.376  | rs13063349  | -3.281 | rs115355859 | 3.280  | rs1257428   | -2.552 | rs73093571  | -3.480 |
| rs715005    | 3.336  | rs571413    | 3.367  | rs147732250 | -3.267 | rs144196860 | 3.255  | rs35172826  | 2.547  | rs72761751  | -3.473 |
| rs147181118 | -3.333 | rs79768863  | 3.356  | rs62018159  | 3.246  | rs12543736  | 3.216  | rs111401946 | -2.541 | rs115088550 | 3.451  |
| rs35605694  | 3.317  | rs17460074  | -3.339 | rs7013204   | -3.242 | rs8095421   | 3.213  | rs6942120   | -2.540 | rs12041355  | -3.448 |
| rs60543345  | 3.303  | rs8095421   | 3.328  | rs2274576   | 3.235  | rs139834560 | 3.212  | rs72923904  | -2.530 | rs210054    | 3.448  |
| rs150893744 | -3.293 | rs142047277 | -3.306 | rs372676611 | 3.233  | rs150407219 | 3.207  | rs138136669 | 2.524  | rs3128126   | -3.438 |
| rs139509348 | -3.290 | rs115618389 | -3.261 | rs483832    | -3.184 | rs112558177 | -3.188 | rs56100436  | -2.518 | rs114580747 | -3.435 |
| rs73883147  | -3.283 | rs188055179 | -3.244 | rs112417976 | -3.180 | rs78738472  | -3.175 | rs181971636 | 2.515  | rs2616506   | 3.423  |

|             |        |             |        |             |        |             |        |             |        |             |        |
|-------------|--------|-------------|--------|-------------|--------|-------------|--------|-------------|--------|-------------|--------|
| rs145579016 | -3.260 | rs75290858  | -3.214 | rs75925401  | -3.160 | rs115088550 | -3.162 | rs9365898   | -2.513 | rs372079812 | 3.418  |
| rs34678735  | -3.256 | rs558548241 | 3.209  | rs76211860  | -3.154 | rs6942120   | -3.146 | rs77148640  | 2.504  | rs11612551  | -3.412 |
| rs17497215  | -3.242 | rs117806396 | 3.204  | rs75139568  | -3.144 | rs72736482  | -3.127 | rs112370475 | -2.503 | rs56320353  | 3.401  |
| rs75511850  | -3.171 | rs6661718   | 3.201  | rs144938519 | 3.096  | rs72836530  | 3.120  |             |        | rs7729781   | -3.370 |
| rs117806396 | -3.168 | rs73158989  | 3.193  | rs116303796 | 3.093  | rs79203737  | 3.118  |             |        | rs61875269  | 3.356  |
| rs183094692 | -3.166 | rs7126865   | -3.168 | rs17313129  | 3.092  | rs1253192   | -3.116 |             |        | rs59239472  | 3.354  |
| rs144569750 | 3.158  | rs149800587 | -3.157 | rs188272993 | -3.085 | rs45622343  | -3.096 |             |        | rs62228460  | -3.345 |
| rs115693042 | -3.146 | rs7995609   | -3.155 | rs61733912  | -3.067 | rs76408259  | 3.087  |             |        | rs28564089  | 3.344  |
| rs79434220  | -3.146 | rs56343681  | -3.141 | rs116998176 | -3.056 | rs11590982  | 3.086  |             |        | rs12497176  | -3.341 |
| rs62458779  | 3.142  | rs16936356  | 3.136  | rs72736482  | 3.042  | rs74874350  | 3.083  |             |        | rs74865437  | -3.341 |
| rs61957283  | 3.137  | rs2286883   | 3.116  | rs13237311  | 3.035  | rs2499618   | 3.075  |             |        | rs6728983   | -3.338 |
| rs75392755  | 3.086  | rs3944003   | 3.113  | rs34920654  | -3.026 | rs7672923   | -3.072 |             |        | rs149022393 | 3.336  |
| rs62018159  | -3.058 | rs74878739  | -3.099 | rs142582914 | 3.018  | rs2057273   | -3.049 |             |        | rs4898984   | 3.333  |
| rs35203503  | -3.057 | rs1014416   | -3.096 | rs77897765  | 3.012  | rs79835059  | 3.047  |             |        | rs144130987 | 3.319  |
| rs4739286   | 3.051  | rs61853454  | 3.090  | rs9650608   | 3.000  | rs6976660   | 3.047  |             |        | rs10507819  | 3.317  |
| rs56100436  | -3.041 | rs150584992 | 3.087  | rs62101454  | -2.992 | rs2288549   | 3.021  |             |        | rs117854460 | -3.299 |
| rs17372186  | -3.040 | rs62408192  | 3.073  | rs80324682  | -2.925 | rs553030    | -3.012 |             |        | rs117521530 | 3.297  |
| rs7559979   | -3.036 | rs144938519 | 3.072  | rs72923978  | -2.919 | rs141225628 | -3.006 |             |        | rs145304966 | 3.296  |
| rs75339750  | 3.029  | rs140941556 | 3.047  | rs142715768 | -2.896 | rs558548241 | 2.994  |             |        | rs76159488  | 3.296  |

|             |        |             |        |             |        |             |        |  |  |             |        |
|-------------|--------|-------------|--------|-------------|--------|-------------|--------|--|--|-------------|--------|
| rs118135146 | -3.010 | rs187412638 | 3.034  | rs17460074  | 2.892  | rs74627356  | -2.991 |  |  | rs1252268   | -3.295 |
| rs7995609   | 2.990  | rs10030903  | -3.030 | rs1175293   | -2.887 | rs183094692 | -2.979 |  |  | rs28988871  | -3.294 |
| rs78918308  | 2.989  | rs188272993 | 2.999  | rs137946119 | -2.885 | rs115144271 | 2.976  |  |  | rs9467573   | -3.279 |
| rs111548256 | -2.981 | rs597384    | 2.982  | rs117979404 | -2.882 | rs112880643 | 2.974  |  |  | rs34836271  | 3.271  |
| rs117854460 | 2.965  | rs149764582 | 2.976  | rs28480361  | -2.876 | rs2586725   | 2.963  |  |  | rs148918967 | 3.255  |
| rs59375134  | -2.952 | rs190645385 | 2.971  | rs553030    | 2.872  | rs523056    | -2.960 |  |  | rs1264403   | -3.250 |
| rs147318384 | 2.946  | rs115382571 | 2.955  | rs115088550 | 2.857  | rs55903221  | -2.960 |  |  | rs79341996  | -3.249 |
| rs142221240 | 2.944  | rs8036417   | -2.950 | rs7995609   | 2.853  | rs6058890   | 2.927  |  |  | rs191014413 | -3.242 |
| rs78211577  | 2.941  | rs9467550   | -2.935 | rs73026185  | 2.844  | rs56100436  | -2.924 |  |  | rs11776420  | 3.233  |
| rs571413    | 2.931  | rs59239472  | 2.919  | rs9467577   | 2.837  | rs139136287 | 2.910  |  |  | rs1990444   | 3.207  |
| rs144567223 | 2.930  | rs35562243  | -2.912 | rs191014413 | -2.821 | rs3096491   | -2.895 |  |  | rs6658460   | -3.181 |
| rs11539148  | 2.930  | rs115264061 | 2.874  | rs149512865 | 2.818  | rs4737288   | -2.855 |  |  | rs1480689   | 3.170  |
| rs58254626  | 2.929  | rs4739284   | -2.873 | rs12548235  | -2.818 | rs9573276   | -2.852 |  |  | rs75177707  | 3.160  |
| rs146519573 | 2.906  | rs111649180 | -2.867 | rs72692627  | 2.804  | rs226225    | 2.850  |  |  | rs61733912  | -3.154 |
| rs115618389 | 2.902  | rs34502193  | 2.858  | rs12642875  | -2.793 | rs147713217 | -2.848 |  |  | rs143982878 | -3.154 |
| rs1927008   | 2.897  | rs296410    | 2.857  | rs77148640  | -2.788 | rs3758294   | 2.814  |  |  | rs917022    | 3.153  |
| rs585064    | -2.887 | rs10939848  | 2.851  | rs56034166  | 2.786  | rs113495032 | 2.812  |  |  | rs2776077   | 3.152  |
| rs600749    | 2.877  | rs34564329  | 2.833  | rs213204    | 2.785  | rs111903406 | -2.791 |  |  | rs12543736  | 3.147  |
| rs4568957   | -2.870 | rs12924762  | -2.822 | rs3944003   | -2.784 | rs75602357  | 2.777  |  |  | rs140853325 | 3.138  |



|             |        |             |        |             |        |             |        |  |  |             |        |
|-------------|--------|-------------|--------|-------------|--------|-------------|--------|--|--|-------------|--------|
| rs1011644   | 2.864  | rs11947505  | -2.805 | rs3894776   | -2.778 | rs72726348  | 2.736  |  |  | rs10013703  | 3.131  |
| rs71577425  | -2.857 | rs117402521 | -2.796 | rs4743758   | -2.776 | rs146020215 | 2.735  |  |  | rs11211907  | 3.098  |
| rs2906740   | -2.854 | rs711866    | -2.792 | rs147220943 | -2.770 | rs149866083 | 2.724  |  |  | rs76990532  | -3.078 |
| rs72707463  | 2.846  | rs210053    | 2.792  | rs2062858   | -2.767 | rs2274576   | 2.719  |  |  | rs2288549   | 3.066  |
| rs12590156  | -2.824 | rs78727630  | 2.787  | rs183094692 | -2.757 | rs147620456 | 2.708  |  |  | rs72836530  | 3.056  |
| rs34502193  | 2.812  | rs116853085 | 2.783  | rs523056    | -2.749 | rs1504310   | 2.673  |  |  | rs73664380  | -3.055 |
| rs74811295  | -2.790 | rs62408168  | -2.775 | rs62257505  | -2.741 | rs111736183 | -2.661 |  |  | rs11176383  | 3.054  |
| rs7973341   | -2.789 | rs12664541  | -2.766 | rs9649399   | 2.726  | rs62232001  | 2.657  |  |  | rs2011323   | -3.050 |
| rs79269048  | 2.787  | rs72761751  | -2.748 | rs739439    | 2.704  | rs12606083  | 2.654  |  |  | rs711866    | -3.024 |
| rs4870924   | 2.774  | rs220812    | 2.745  | rs28383507  | -2.704 | rs118003136 | 2.645  |  |  | rs73039859  | 3.024  |
| rs148273366 | 2.773  | rs147220943 | 2.744  | rs578654    | -2.701 | rs483832    | -2.642 |  |  | rs75791417  | -3.019 |
| rs112941034 | 2.773  | rs35095143  | 2.737  | rs72661791  | -2.693 | rs6085377   | -2.637 |  |  | rs7951159   | 3.019  |
| rs10507819  | -2.755 | rs114558563 | 2.734  | rs7327960   | -2.692 | rs62455215  | -2.636 |  |  | rs8095421   | 3.018  |
| rs11487824  | 2.722  | rs117209692 | 2.732  | rs1050046   | 2.682  | rs56206332  | -2.625 |  |  | rs1724298   | -3.014 |
| rs9855337   | 2.718  | rs17215096  | -2.713 | rs71517255  | -2.681 | rs34105866  | 2.624  |  |  | rs113805662 | -2.999 |
| rs9342222   | 2.717  | rs12380720  | 2.712  | rs139998786 | 2.678  | rs137953078 | -2.623 |  |  | rs117109583 | -2.999 |
| rs34105866  | -2.714 | rs144405150 | 2.686  | rs115972027 | -2.674 | rs6549824   | -2.623 |  |  | rs1252916   | -2.997 |
| rs2586725   | -2.709 | rs147623796 | 2.685  | rs76781091  | 2.660  | rs11030918  | 2.619  |  |  | rs75915001  | -2.995 |
| rs4731953   | -2.706 | rs803070    | 2.674  | rs111732500 | -2.655 | rs140931342 | -2.608 |  |  | rs62371997  | -2.975 |

|             |        |             |        |             |        |             |        |  |  |             |        |
|-------------|--------|-------------|--------|-------------|--------|-------------|--------|--|--|-------------|--------|
| rs6818784   | -2.697 | rs76377034  | -2.660 | rs72906179  | -2.650 | rs79735330  | -2.555 |  |  | rs118135146 | -2.960 |
| rs188055179 | -2.689 | rs4738035   | 2.654  | rs3735645   | 2.624  | rs144468079 | 2.553  |  |  | rs76435383  | -2.944 |
| rs79406090  | 2.686  | rs1467632   | 2.648  | rs61834633  | -2.623 | rs12446868  | -2.550 |  |  | rs75339750  | 2.942  |
| rs144876987 | -2.685 | rs72836530  | -2.647 | rs117348380 | 2.616  | rs188272993 | 2.550  |  |  | rs117075001 | -2.939 |
| rs73832368  | -2.663 | rs17286391  | -2.642 | rs142011155 | -2.609 | rs6949760   | 2.542  |  |  | rs115264061 | -2.934 |
| rs2286883   | 2.662  | rs35382     | 2.634  | rs12204127  | 2.598  | rs146058268 | -2.541 |  |  | rs139834560 | -2.929 |
| rs62408192  | -2.642 | rs11774868  | 2.631  | rs10187018  | 2.597  | rs143355724 | -2.539 |  |  | rs75203411  | -2.927 |
| rs78243378  | 2.625  | rs116543900 | -2.629 | rs34105866  | -2.593 | rs73054110  | 2.522  |  |  | rs10106918  | 2.916  |
| rs117075001 | -2.615 | rs991932    | -2.619 | rs17579352  | 2.585  | rs113112399 | 2.517  |  |  | rs181625218 | 2.908  |
| rs16936482  | 2.613  | rs9573276   | -2.616 | rs78738472  | -2.584 | rs61783205  | 2.512  |  |  | rs13087237  | 2.907  |
| rs116846781 | -2.605 | rs55910145  | -2.609 | rs2289577   | 2.550  | rs142826642 | 2.511  |  |  | rs147713217 | 2.902  |
| rs112105368 | 2.601  | rs118003136 | 2.606  | rs117110314 | -2.529 |             |        |  |  | rs187412638 | -2.901 |
| rs113547143 | 2.599  | rs112941034 | -2.605 | rs7955946   | -2.523 |             |        |  |  | rs600749    | 2.887  |
| rs142180874 | -2.587 | rs9342222   | 2.592  | rs61740929  | 2.522  |             |        |  |  | rs117128147 | 2.867  |
| rs71653924  | -2.586 | rs79361541  | -2.585 | rs148766958 | -2.519 |             |        |  |  | rs143415132 | -2.859 |
| rs182081961 | 2.582  | rs142180874 | -2.584 | rs549658720 | 2.519  |             |        |  |  | rs140819465 | -2.848 |
| rs190264799 | 2.568  | rs137953078 | -2.578 | rs147225021 | 2.511  |             |        |  |  | rs72736482  | -2.848 |
| rs56223081  | 2.564  | rs8142326   | -2.577 | rs10797854  | 2.510  |             |        |  |  | rs7739280   | -2.839 |
| rs143183935 | -2.563 | rs7220217   | -2.577 |             |        |             |        |  |  | rs1122757   | 2.831  |









**Supplementary Table 5.** Significant brain regions from MRI components associated with SNPs from mesocorticolimbic DAT1 ePRS for every age band.

| <b>Significant brain regions for MRI component 27 - Age band 40 to 45 years old</b> |                      |                        |                                                |                            |
|-------------------------------------------------------------------------------------|----------------------|------------------------|------------------------------------------------|----------------------------|
| <i>Area</i>                                                                         | <i>Brodmann Area</i> | <i>Volume (cc) L/R</i> | <i>Random effects: Max Value (x, y, z) L/R</i> | <i>MNI (x, y, z) L/R</i>   |
| Positive                                                                            |                      |                        |                                                |                            |
| Lentiform Nucleus                                                                   | *                    | 0.1/0.1                | 2.8 (-18, 12, -8)/4.6 (15, 8, -9)              | (-18, 13, -9)/(15, 9, -10) |
| Caudate                                                                             | *                    | 0.1/0.1                | 4.4 (-7, 9, -5)/3.5 (8, 10, -4)                | (-7, 10, -5)/(8, 11, -4)   |
| Anterior Cingulate                                                                  | 25                   | 0.1/0.0                | 3.1 (-2, 5, -4)/-999.0 (0, 0, 0)               | (-2, 5, -4)/(0, 0, 0)      |
| Negative                                                                            |                      |                        |                                                |                            |
| Insula                                                                              | *                    | 0.1/0.1                | 3.0 (-38, -7, -4)/2.5 (37, -7, -3)             | (-38, -7, -5)/(37, -7, -4) |
| Inferior Frontal Gyrus                                                              | 47                   | 0.0/0.1                | -999.0 (0, 0, 0)/2.5 (40, 15, -5)              | (0, 0, 0)/(40, 16, -5)     |
| <b>Significant brain regions for MRI component 1 - Age band 46 to 50 years old</b>  |                      |                        |                                                |                            |
| <i>Area</i>                                                                         | <i>Brodmann Area</i> | <i>Volume (cc) L/R</i> | <i>Random effects: Max Value (x, y, z) L/R</i> | <i>MNI (x, y, z) L/R</i>   |
| Positive                                                                            |                      |                        |                                                |                            |
| Cingulate Gyrus                                                                     | 31                   | 0.1/0.0                | 4.7 (-3, -42, 30)/-999.0 (0, 0, 0)             | (-3, -45, 30)/(0, 0, 0)    |
| Insula                                                                              | 13                   | 0.1/0.1                | 2.6 (-40, -7, 0)/3.5 (37, -7, -3)              | (-40, -7, -1)/(37, -7, -4) |
| Caudate                                                                             | *                    | 0.1/0.0                | 3.2 (-12, 16, -2)/-999.0 (0, 0, 0)             | (-12, 17, -1)/(0, 0, 0)    |
| Lentiform Nucleus                                                                   | *                    | 0.0/0.1                | -999.0 (0, 0, 0)/3.1 (17, 5, -9)               | (0, 0, 0)/(17, 6, -10)     |
| Medial Frontal Gyrus                                                                | *                    | 0.0/0.1                | -999.0 (0, 0, 0)/3.0 (14, 19, -15)             | (0, 0, 0)/(14, 20, -17)    |

|                                                                                     |                      |                        |                                                |                              |
|-------------------------------------------------------------------------------------|----------------------|------------------------|------------------------------------------------|------------------------------|
| Parahippocampal Gyrus                                                               | 28                   | 0.0/0.1                | -999.0 (0, 0, 0)/2.7 (20, -14, -18)            | (0, 0, 0)/(20, -13, -22)     |
| Negative                                                                            |                      |                        |                                                |                              |
| Parahippocampal Gyrus                                                               | 36                   | 0.0/0.2                | -999.0 (0, 0, 0)/4.4 (28, -24, -21)            | (0, 0, 0)/(28, -24, -26)     |
| Anterior Cingulate                                                                  | *                    | 0.0/0.1                | -999.0 (0, 0, 0)/3.7 (6, 36, 7)                | (0, 0, 0)/(6, 37, 10)        |
| Insula                                                                              | 13                   | 0.0/0.1                | -999.0 (0, 0, 0)/3.1 (41, 7, -5)               | (0, 0, 0)/(41, 7, -5)        |
| Caudate                                                                             | *                    | 0.1/0.1                | 2.7 (-9, 12, -1)/2.5 (14, -4, 18)              | (-9, 12, -1)/(14, -5, 19)    |
| <b>Significant brain regions for MRI component 37 - Age band 51 to 55 years old</b> |                      |                        |                                                |                              |
| <i>Area</i>                                                                         | <i>Brodmann Area</i> | <i>Volume (cc) L/R</i> | <i>Random effects: Max Value (x, y, z) L/R</i> | <i>MNI (x, y, z) L/R</i>     |
| Positive                                                                            |                      |                        |                                                |                              |
| Caudate                                                                             | *                    | 0.1/0.0                | 3.7 (-7, 10, 0)/-999.0 (0, 0, 0)               | (-7, 10, 0)/(0, 0, 0)        |
| Thalamus                                                                            | *                    | 0.0/0.1                | -999.0 (0, 0, 0)/3.1 (8, -25, 3)               | (0, 0, 0)/(8, -26, 2)        |
| Parahippocampal Gyrus                                                               | *                    | 0.0/0.2                | -999.0 (0, 0, 0)/3.1 (26, -5, -12)             | (0, 0, 0)/(26, -5, -15)      |
| Inferior Frontal Gyrus                                                              | *                    | 0.1/0.0                | 3.1 (-13, 26, -17)/-999.0 (0, 0, 0)            | (-13, 28, -19)/(0, 0, 0)     |
| Negative                                                                            |                      |                        |                                                |                              |
| Medial Frontal Gyrus                                                                | 25                   | 0.1/0.1                | 3.7 (-13, 19, -16)/4.3 (14, 11, -15)           | (-13, 20, -18)/(14, 12, -17) |
| Fusiform Gyrus                                                                      | 20                   | 0.0/0.1                | -999.0 (0, 0, 0)/3.1 (31, -41, -16)            | (0, 0, 0)/(31, -41, -21)     |
| Lentiform Nucleus                                                                   | *                    | 0.0/0.1                | -999.0 (0, 0, 0)/2.9 (21, 14, -3)              | (0, 0, 0)/(21, 15, -3)       |
| Parahippocampal Gyrus                                                               | *                    | 0.0/0.1                | -999.0 (0, 0, 0)/2.8 (27, -18, -13)            | (0, 0, 0)/(27, -18, -17)     |



**Significant brain regions for MRI component 17 - Age band 56 to 60 years old**

| <i>Area</i>            | <i>Brodmann Area</i> | <i>Volume (cc) L/R</i> | <i>Random effects: Max Value (x, y, z) L/R</i> | <i>MNI (x, y, z) L/R</i>     |
|------------------------|----------------------|------------------------|------------------------------------------------|------------------------------|
| Positive               |                      |                        |                                                |                              |
| Medial Frontal Gyrus   | 25                   | 0.2/0.1                | 7.9 (-12, 28, -17)/5.0 (12, 24, -16)           | (-12, 30, -19)/(12, 26, -17) |
| Caudate                | *                    | 0.1/0.0                | 2.8 (-5, 10, -3)/-999.0 (0, 0, 0)              | (-5, 10, -3)/(0, 0, 0)       |
| Inferior Frontal Gyrus | *                    | 0.0/0.1                | -999.0 (0, 0, 0)/2.7 (13, 31, -19)             | (0, 0, 0)/(13, 33, -21)      |
| Negative               |                      |                        |                                                |                              |
| Anterior Cingulate     | 25                   | 0.1/0.1                | 3.2 (-2, 8, -3)/2.8 (3, 8, -3)                 | (-2, 8, -3)/(3, 8, -3)       |
| Thalamus               | *                    | 0.1/0.0                | 2.6 (-6, -24, 9)/-999.0 (0, 0, 0)              | (-6, -25, 8)/(0, 0, 0)       |

**Significant brain regions for MRI component 21 - Age band 61 to 65 years old**

| <i>Area</i>           | <i>Brodmann Area</i> | <i>Volume (cc) L/R</i> | <i>Random effects: Max Value (x, y, z) L/R</i> | <i>MNI (x, y, z) L/R</i> |
|-----------------------|----------------------|------------------------|------------------------------------------------|--------------------------|
| Positive              |                      |                        |                                                |                          |
| Insula                | 13                   | 0.0/0.1                | -999.0 (0, 0, 0)/7.2 (38, -2, -5)              | (0, 0, 0)/(38, -2, -6)   |
| Parahippocampal Gyrus | *                    | 0.0/0.1                | -999.0 (0, 0, 0)/2.6 (22, -35, -2)             | (0, 0, 0)/(22, -36, -4)  |
| Negative              |                      |                        |                                                |                          |
| Insula                | *                    | 0.0/0.1                | -999.0 (0, 0, 0)/3.6 (38, -5, -6)              | (0, 0, 0)/(38, -5, -7)   |
| Thalamus              | *                    | 0.1/0.0                | 3.1 (-8, -28, 5)/-999.0 (0, 0, 0)              | (-8, -29, 4)/(0, 0, 0)   |

**Significant brain regions for MRI component 29 - Age band 66 to 70 years old**

| <i>Area</i>            | <i>Brodmann Area</i> | <i>Volume (cc) L/R</i> | <i>Random effects: Max Value (x, y, z) L/R</i> | <i>MNI (x, y, z) L/R</i>      |
|------------------------|----------------------|------------------------|------------------------------------------------|-------------------------------|
| Positive               |                      |                        |                                                |                               |
| Caudate                | *                    | 0.2/0.1                | 3.5 (-8, 6, 9)/2.6 (8, 8, 3)                   | (-8, 6, 10)/(8, 8, 4)         |
| Parahippocampal Gyrus  | 28, 34               | 0.1/0.1                | 3.4 (-18, -8, -16)/3.0 (21, -15, -19)          | (-18, -7, -20)/(21, -14, -24) |
| Anterior Cingulate     | 32                   | 0.1/0.0                | 3.0 (-5, 32, -3)/-999.0 (0, 0, 0)              | (-5, 33, -2)/(0, 0, 0)        |
| Cingulate Gyrus        | 31                   | 0.1/0.0                | 2.6 (-3, -38, 27)/-999.0 (0, 0, 0)             | (-3, -40, 27)/(0, 0, 0)       |
| Insula                 | *                    | 0.1/0.0                | 2.6 (-36, 11, -3)/-999.0 (0, 0, 0)             | (-36, 11, -3)/(0, 0, 0)       |
| Fusiform Gyrus         | 20                   | 0.0/0.1                | -999.0 (0, 0, 0)/2.6 (34, -36, -18)            | (0, 0, 0)/(34, -36, -24)      |
| Negative               |                      |                        |                                                |                               |
| Medial Frontal Gyrus   | 25                   | 0.1/0.1                | 4.0 (-15, 11, -16)/3.0 (12, 28, -17)           | (-15, 12, -18)/(12, 30, -18)  |
| Caudate                | *                    | 0.1/0.0                | 3.4 (-5, 8, -3)/-999.0 (0, 0, 0)               | (-5, 8, -3)/(0, 0, 0)         |
| Insula                 | 13                   | 0.0/0.1                | -999.0 (0, 0, 0)/3.3 (39, -8, 5)               | (0, 0, 0)/(39, -8, 5)         |
| Inferior Frontal Gyrus | 47                   | 0.0/0.2                | -999.0 (0, 0, 0)/3.3 (13, 18, -19)             | (0, 0, 0)/(13, 19, -21)       |
| Thalamus               | *                    | 0.1/0.0                | 2.8 (-5, -19, 4)/-999.0 (0, 0, 0)              | (-5, -20, 3)/(0, 0, 0)        |

\* Coordinates outside Brodmann areas

**Supplementary Table 6.** Enrichment analysis using MetaCore® for each reported genetic component from pICA.

|                                                             | <b>Pathway Maps (FDR&lt;0.05)</b>                                                                                                                                                                                           | <b>Gene Ontology Processes (FDR&lt;0.05)</b>                                                                                                                                                                                                                                                                                                                                                                                                                                                                                                                                              |
|-------------------------------------------------------------|-----------------------------------------------------------------------------------------------------------------------------------------------------------------------------------------------------------------------------|-------------------------------------------------------------------------------------------------------------------------------------------------------------------------------------------------------------------------------------------------------------------------------------------------------------------------------------------------------------------------------------------------------------------------------------------------------------------------------------------------------------------------------------------------------------------------------------------|
| Age band:<br>40 to 45<br>yrs<br><br>SNP<br>component:<br>63 | DNA damage_ATM/ATR regulation of G2/M<br>checkpoint: nuclear signaling<br><br>Cell cycle_Chromosome condensation in<br>prometaphase<br><br>GTP metabolism<br><br>Development_WNT/Beta-catenin signaling in the<br>cytoplasm | Central nervous system development, neuron<br>development, neurogenesis, axonogenesis<br><br>Regulation of synapse structure or activity<br><br>Cell morphogenesis involved in neuron<br>differentiation, cell projection morphogenesis<br><br>Anatomical structure development and<br>morphogenesis<br><br>Cellular response to catecholamine, monoamine<br>and insulin stimulus<br><br>Regulation of glutamate receptor signaling<br>pathway<br><br>Response to monoamine and catecholamine<br><br>Negative regulation of insulin secretion<br>involved in cellular response to glucose |
| Age band:<br>46 to 50<br>yrs<br><br>SNP<br>component:<br>42 | DNA damage_ATM/ATR regulation of G2/M<br>checkpoint: nuclear signaling<br><br>GTP metabolism<br><br>Neurophysiological process_Ephrin-B receptors in<br>dendritic spine morphogenesis and synaptogenesis                    | Central nervous system development, neuron<br>development, neurogenesis, axonogenesis<br><br>Regulation of synapse structure or activity<br><br>Cell morphogenesis involved in neuron<br>differentiation, cell projection morphogenesis<br><br>Anatomical structure development and<br>morphogenesis<br><br>Cellular response to catecholamine, monoamine<br>and insulin stimulus                                                                                                                                                                                                         |

|                                                                        |                                                                                                                                                                                                                                                            |                                                                                                                                                                                                                                                                                                                                                                                                                                                                                                                                                                                                        |
|------------------------------------------------------------------------|------------------------------------------------------------------------------------------------------------------------------------------------------------------------------------------------------------------------------------------------------------|--------------------------------------------------------------------------------------------------------------------------------------------------------------------------------------------------------------------------------------------------------------------------------------------------------------------------------------------------------------------------------------------------------------------------------------------------------------------------------------------------------------------------------------------------------------------------------------------------------|
|                                                                        |                                                                                                                                                                                                                                                            | <p>Regulation of glutamate receptor signaling pathway</p> <p>Response to monoamine and catecholamine</p> <p>Negative regulation of insulin secretion involved in cellular response to glucose</p>                                                                                                                                                                                                                                                                                                                                                                                                      |
| <p>Age band:<br/>51 to 55<br/>yrs</p> <p>SNP<br/>component:<br/>44</p> | <p>DNA damage_ATM/ATR regulation of G2/M<br/>checkpoint: nuclear signaling</p> <p>GTP metabolism</p>                                                                                                                                                       | <p>Central nervous system development, neuron<br/>development, neurogenesis, axonogenesis</p> <p>Regulation of synapse structure or activity</p> <p>Cell morphogenesis involved in neuron<br/>differentiation, cell projection morphogenesis</p> <p>Anatomical structure development and<br/>morphogenesis</p> <p>Cellular response to catecholamine, monoamine<br/>and insulin stimulus</p> <p>Regulation of glutamate receptor signaling<br/>pathway</p> <p>Response to monoamine and catecholamine</p> <p>Negative regulation of insulin secretion<br/>involved in cellular response to glucose</p> |
| <p>Age band:<br/>56 to 60<br/>yrs</p> <p>SNP<br/>component:<br/>39</p> | <p>Neurophysiological process_Ephrin-B receptors in<br/>dendritic spine morphogenesis and synaptogenesis</p> <p>GTP metabolism</p> <p>Role of epigenetic alterations in survival and<br/>migration of SCLC cells</p> <p>Cell adhesion_Ephrin signaling</p> | <p>Central nervous system development, neuron<br/>development, neurogenesis, axonogenesis</p> <p>Regulation of synapse structure or activity</p> <p>Cell morphogenesis involved in neuron<br/>differentiation, cell projection morphogenesis</p> <p>Anatomical structure development and<br/>morphogenesis</p>                                                                                                                                                                                                                                                                                         |

|                                                                        |                                                                                                                                                                                           |                                                                                                                                                                                                                                                                                                                                                                                                                                                                                                                                                                       |
|------------------------------------------------------------------------|-------------------------------------------------------------------------------------------------------------------------------------------------------------------------------------------|-----------------------------------------------------------------------------------------------------------------------------------------------------------------------------------------------------------------------------------------------------------------------------------------------------------------------------------------------------------------------------------------------------------------------------------------------------------------------------------------------------------------------------------------------------------------------|
|                                                                        |                                                                                                                                                                                           | <p>Cellular response to catecholamine, monoamine and insulin stimulus</p> <p>Regulation of glutamate receptor signaling pathway</p> <p>Response to monoamine and catecholamine</p> <p>Negative regulation of insulin secretion involved in cellular response to glucose</p>                                                                                                                                                                                                                                                                                           |
| <p>Age band:<br/>61 to 65<br/>yrs</p> <p>SNP<br/>component:<br/>50</p> | <p>Neurophysiological process_Ephrin-B receptors in dendritic spine morphogenesis and synaptogenesis</p> <p>Cytoskeleton remodeling_Keratin filaments</p> <p>Cell Adhesion_Desmosomes</p> | <p>Central nervous system development, neuron development, neurogenesis, axonogenesis</p> <p>Regulation of synapse structure or activity</p> <p>Cell morphogenesis involved in neuron differentiation, cell projection morphogenesis</p> <p>Anatomical structure development and morphogenesis</p> <p>Cellular response to catecholamine and monoamine stimulus</p> <p>Regulation of glutamate receptor signaling pathway</p> <p>Response to monoamine and catecholamine</p> <p>Regulation of insulin secretion involved in cellular response to glucose stimulus</p> |
| <p>Age band:<br/>66 to 70<br/>yrs</p>                                  |                                                                                                                                                                                           | <p>Central nervous system development, neuron development, neurogenesis, axonogenesis</p> <p>Regulation of synapse structure or activity</p> <p>Cell morphogenesis involved in neuron differentiation, cell projection morphogenesis</p>                                                                                                                                                                                                                                                                                                                              |

|                                  |  |                                                                                                                                                                                                                                                                                                                              |
|----------------------------------|--|------------------------------------------------------------------------------------------------------------------------------------------------------------------------------------------------------------------------------------------------------------------------------------------------------------------------------|
| <p>SNP<br/>component:<br/>15</p> |  | <p>Anatomical structure development and morphogenesis</p> <p>Cellular response to catecholamine and monoamine stimulus</p> <p>Regulation of glutamate receptor signaling pathway</p> <p>Response to monoamine and catecholamine</p> <p>Negative regulation of insulin secretion involved in cellular response to glucose</p> |
|----------------------------------|--|------------------------------------------------------------------------------------------------------------------------------------------------------------------------------------------------------------------------------------------------------------------------------------------------------------------------------|

## Supplementary References

1. Bycroft C, Freeman C, Petkova D, Band G, Elliott LT, Sharp K *et al*. The UK Biobank resource with deep phenotyping and genomic data. *Nature* 2018; **562**(7726): 203.
2. Galinsky KJ, Bhatia G, Loh PR, Georgiev S, Mukherjee S, Patterson NJ *et al*. Fast Principal-Component Analysis Reveals Convergent Evolution of ADH1B in Europe and East Asia. *Am J Hum Genet* 2016; **98**(3): 456-472.
3. Richmond RC, Timpson NJ, Felix JF, Palmer T, Gaillard R, McMahon G *et al*. Using genetic variation to explore the causal effect of maternal pregnancy adiposity on future offspring adiposity: a Mendelian randomisation study. *PLoS medicine* 2017; **14**(1).
4. Patterson N, Price AL, Reich D. Population structure and eigenanalysis. *PLoS genetics* 2006; **2**(12).
5. Price AL, Patterson NJ, Plenge RM, Weinblatt ME, Shadick NA, Reich D. Principal components analysis corrects for stratification in genome-wide association studies. *Nature genetics* 2006; **38**(8): 904-909.
6. Miller JA, Ding S-L, Sunkin SM, Smith KA, Ng L, Szafer A *et al*. Transcriptional landscape of the prenatal human brain. *Nature* 2014; **508**(7495): 199.
7. R CT. *R: A language and environment for statistical computing*. R Foundation for Statistical Computing: Vienna, Austria, 2014.
8. Galili T, O'Callaghan A, Sidi J, Sievert C. heatmaply: an R package for creating interactive cluster heatmaps for online publishing. *Bioinformatics* 2018; **34**(9): 1600-1602.
9. Zheng J, Erzurumluoglu AM, Elsworth BL, Kemp JP, Howe L, Haycock PC *et al*. LD Hub: a centralized database and web interface to perform LD score regression that maximizes the potential of summary level GWAS data for SNP heritability and genetic correlation analysis. *Bioinformatics* 2017; **33**(2): 272-279.
10. Schizophrenia Psychiatric Genome-Wide Association Study C. Genome-wide association study identifies five new schizophrenia loci. *Nat Genet* 2011; **43**(10): 969-976.
11. Demontis D, Walters RK, Martin J, Mattheisen M, Als TD, Agerbo E *et al*. Discovery of the first genome-wide significant risk loci for attention deficit/hyperactivity disorder. *Nature Genetics* 2019; **51**(1): 63-75.
12. Wray NR, Ripke S, Mattheisen M, Trzaskowski M, Byrne EM, Abdellaoui A *et al*. Genome-wide association analyses identify 44 risk variants and refine the genetic architecture of major depression. *Nature genetics* 2018; **50**(5): 668.

13. Mullins N, Bigdeli TB, Børglum AD, Coleman JR, Demontis D, Mehta D *et al*. GWAS of suicide attempt in psychiatric disorders and association with major depression polygenic risk scores. *American journal of psychiatry* 2019; appi. ajp. 2019.18080957.
14. Xue A, Wu Y, Zhu Z, Zhang F, Kemper KE, Zheng Z *et al*. Genome-wide association analyses identify 143 risk variants and putative regulatory mechanisms for type 2 diabetes. *Nature communications* 2018; **9**(1): 1-14.
15. Locke AE, Kahali B, Berndt SI, Justice AE, Pers TH, Day FR *et al*. Genetic studies of body mass index yield new insights for obesity biology. *Nature* 2015; **518**(7538): 197-206.
16. Siewert KM, Voight BF. Bivariate genome-wide association scan identifies 6 novel loci associated with lipid levels and coronary artery disease. *Circulation: Genomic and Precision Medicine* 2018; **11**(12): e002239.
17. Watanabe K, Taskesen E, van Bochoven A, Posthuma D. Functional mapping and annotation of genetic associations with FUMA. *Nat Commun* 2017; **8**(1): 1826.
18. Gandal MJ, Haney JR, Parikshak NN, Leppa V, Ramaswami G, Hartl C *et al*. Shared molecular neuropathology across major psychiatric disorders parallels polygenic overlap. *Science* 2018; **359**(6376): 693-697.
19. de Lima RMS, Barth B, Arcego DM, de Mendonça Filho EJ, Clappison A, Patel S *et al*. Amygdala 5-HTT Gene Network Moderates the Effects of Postnatal Adversity on Attention Problems: Anatomico-Functional Correlation and Epigenetic Changes. *Front Neurosci* 2020; **14**: 198.
20. Cox JL, Holden JM, Sagovsky R. Detection of postnatal depression: development of the 10-item Edinburgh Postnatal Depression Scale. *The British journal of psychiatry* 1987; **150**(6): 782-786.
21. Organization WH. ICD-10 : international statistical classification of diseases and related health problems : tenth revision. 2 edn2004.
22. Goodman R. The Strengths and Difficulties Questionnaire: a research note. *Journal of child psychology and psychiatry* 1997; **38**(5): 581-586.
23. Lewis G. Assessing psychiatric disorder with a human interviewer or a computer. *Journal of Epidemiology & Community Health* 1994; **48**(2): 207-210.
24. Wallace TM, Levy JC, Matthews DR. Use and abuse of HOMA modeling. *Diabetes care* 2004; **27**(6): 1487-1495.



25. Alfaro-Almagro F, Jenkinson M, Bangerter NK, Andersson JL, Griffanti L, Douaud G *et al*. Image processing and Quality Control for the first 10,000 brain imaging datasets from UK Biobank. *Neuroimage* 2018; **166**: 400-424.
